# Supplementary material for: Temperature-Controlled Divergent Synthesis of Pyrazoles and 1-Tosyl-1H-pyrazoles under Transition-Metal-Catalyst- and Oxidant-Free Conditions
Source: MDPI journal article supplement (doi:10.3390/molecules29081706), 2024-04-10

# Supporting Information

## Temperature-controlled divergent synthesis of pyrazoles and 1-tosyl-1*H*-pyrazoles under transition-metal-catalyst and oxidant-free conditions

Kai Wang,<sup>1</sup> Wenjing Xu,<sup>1</sup> Chengcai Xia<sup>2,\*</sup> and Xian-Ting Cao<sup>1,\*</sup>

1. College of Medical Engineering & the Key Laboratory for Medical Functional Nanomaterials, Jining Medical University, Jining, 272067, China.
2. Institute of Pharmacology, Pharmacy College, Shandong First Medical University & Shandong Academy of Medical Sciences, Jinan 271016, China. Emails:  
E-mail address: chemcxt@mail.jnmc.edu.cn; xiachc@163.com.

### Table of Contents

|                                                                        |   |
|------------------------------------------------------------------------|---|
| 1. Reaction progress diagram of 2a.....                                | 2 |
| 2. Optimization of reaction conditions.....                            | 3 |
| 3. Yields of recyclability test.....                                   | 3 |
| 4. <sup>1</sup> H and <sup>13</sup> C NMR spectra of the products..... | 4 |

## 1. Reaction progress diagram of 2a.

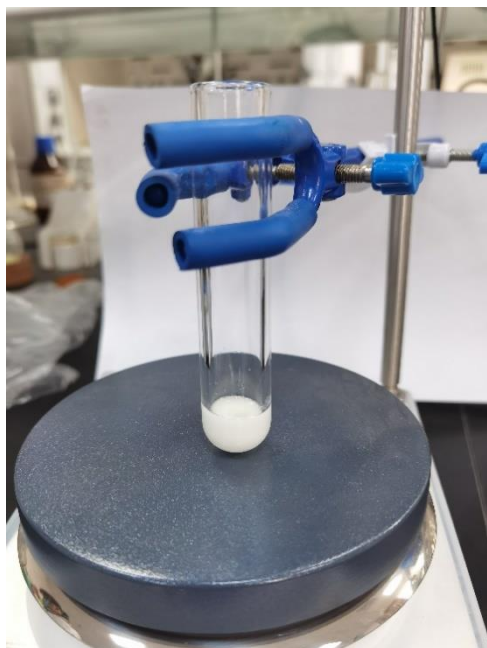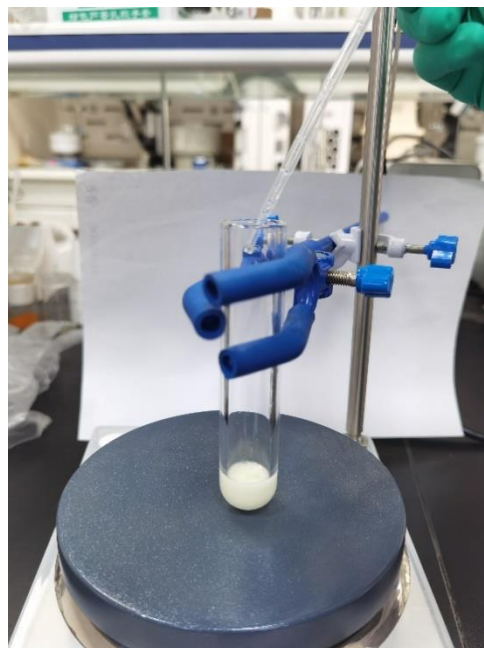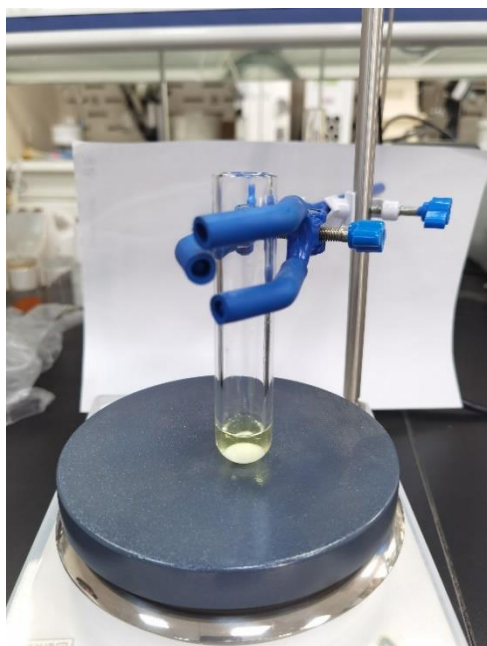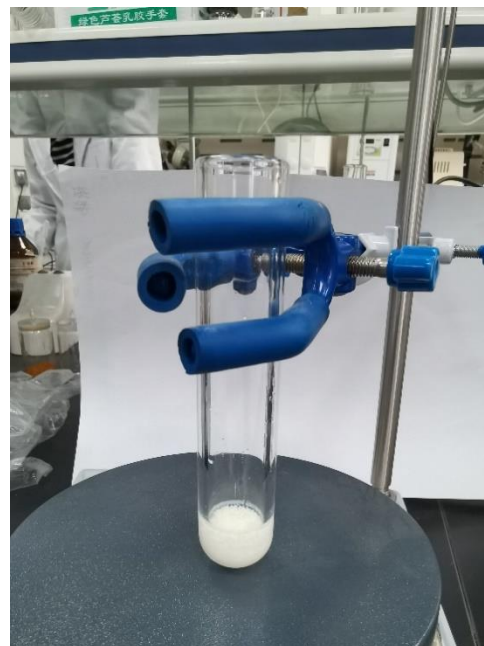

## 2. Optimization of Reaction Conditions <sup>a,b</sup>

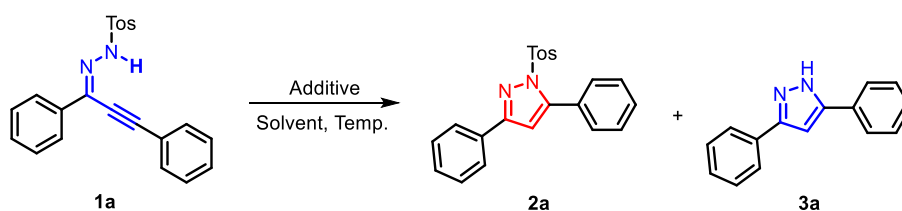

| Entry | Solvent                | Yield of 2a [%] <sup>b</sup>      | Yield of 3a [%] <sup>b</sup>      |
|-------|------------------------|-----------------------------------|-----------------------------------|
| 1     | CH <sub>3</sub> CN     | N.R.                              | N.R.                              |
| 2     | DMSO                   | N.R.                              | N.R.                              |
| 3     | THF                    | N.R.                              | N.R.                              |
| 4     | AcOH                   | N.R.                              | N.R.                              |
| 5     | EtOH                   | N.R. (95) <sup>d</sup>            | N.R. (65) <sup>e</sup>            |
| 6     | EtOH                   | 73 <sup>f</sup>                   | 38 <sup>g</sup>                   |
| 7     | EtOH                   | 47 <sup>h</sup> (97) <sup>i</sup> | 28 <sup>h</sup> (68) <sup>i</sup> |
| 8     | [HDBU][OAc]            | 98                                | 85 <sup>c</sup> (13) <sup>j</sup> |
| 9     | [HDBU][NHS]            | 95                                | 78 <sup>c</sup>                   |
| 10    | [HTMG][NHS]            | 78                                | 63 <sup>c</sup>                   |
| 11    | [HDBU][OAc][NHS]       | 86                                | 68 <sup>c</sup>                   |
| 12    | [HTMG][HDBU][OAc][NHS] | 80                                | 58 <sup>c</sup>                   |

<sup>[a]</sup> Reaction conditions: **1a** (0.2 mmol), solvent (2.0 mL), rt., 0.5 h; <sup>[b]</sup> Isolated yields; <sup>[c]</sup> 95 °C, 12 h. <sup>[d]</sup> DBU (1.0 equiv.) additive, rt., 0.5 h. <sup>[e]</sup> DBU (1.0 equiv.) additive, 95 °C, 12 h. <sup>[f]</sup> DBU (1.0 equiv.) additive, 50 °C., 0.5 h. <sup>[g]</sup> DBU (1.0 equiv.) additive, 50 °C., 12 h. <sup>[h]</sup> DBU (0.5 equiv.) additive, rt., 0.5 h. <sup>[i]</sup> DBU (2.0 equiv.) additive, 95 °C, 12 h. <sup>[j]</sup> 40 °C, 12 h. [HDBU] = 2,3,4,6,7,8,9,10-octahydropyrimido[1,2-*a*]azepin-1-ium, [NHS] = 2,5-dioxopyrrolidin-1-olate, [HTMG] = bis(dimethylamino)-methaniminium.

## 3. Yields of recyclability test.

| Run<br>Yield (%) | 1  | 2  | 3  | 4  | 5  |
|------------------|----|----|----|----|----|
| 2a               | 95 | 93 | 92 | 88 | 84 |
| 3a               | 85 | 82 | 77 | 71 | 72 |

#### 4. $^1\text{H}$ and $^{13}\text{C}$ NMR spectra of the products.

Figure S1  $^1\text{H}$  NMR Spectra of Compound of 2a

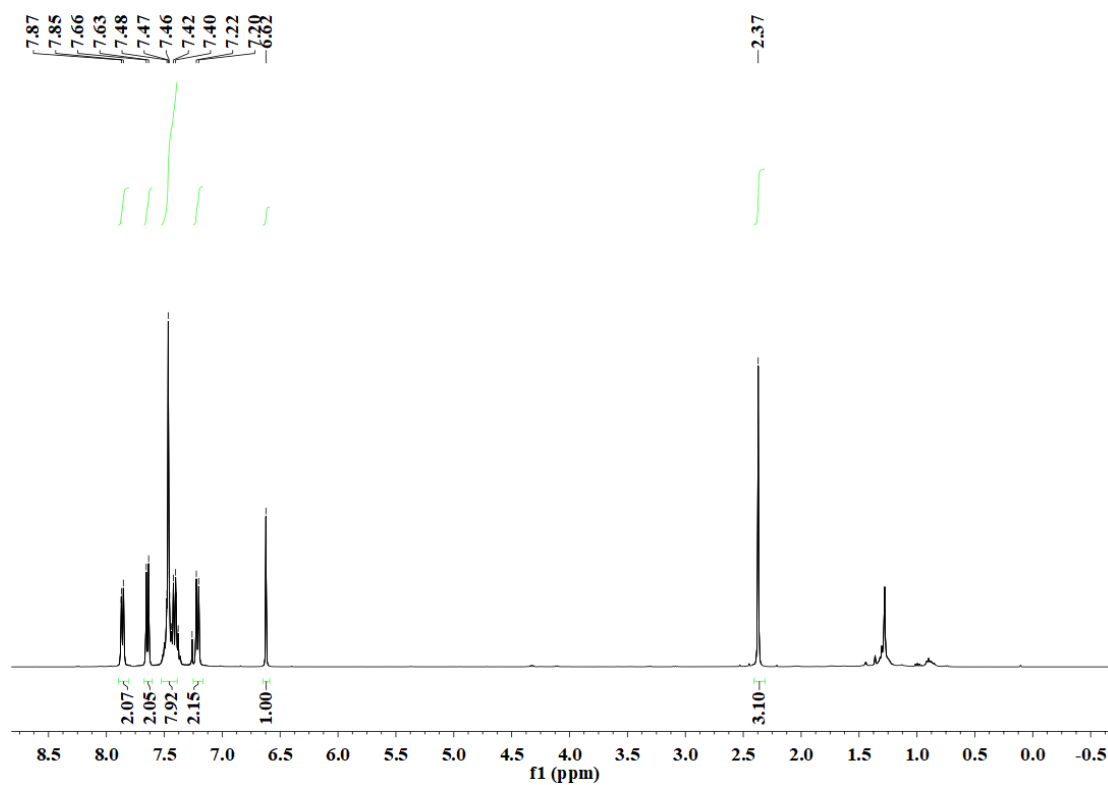

Figure S2  $^{13}\text{C}$  NMR Spectra of Compound of 2a

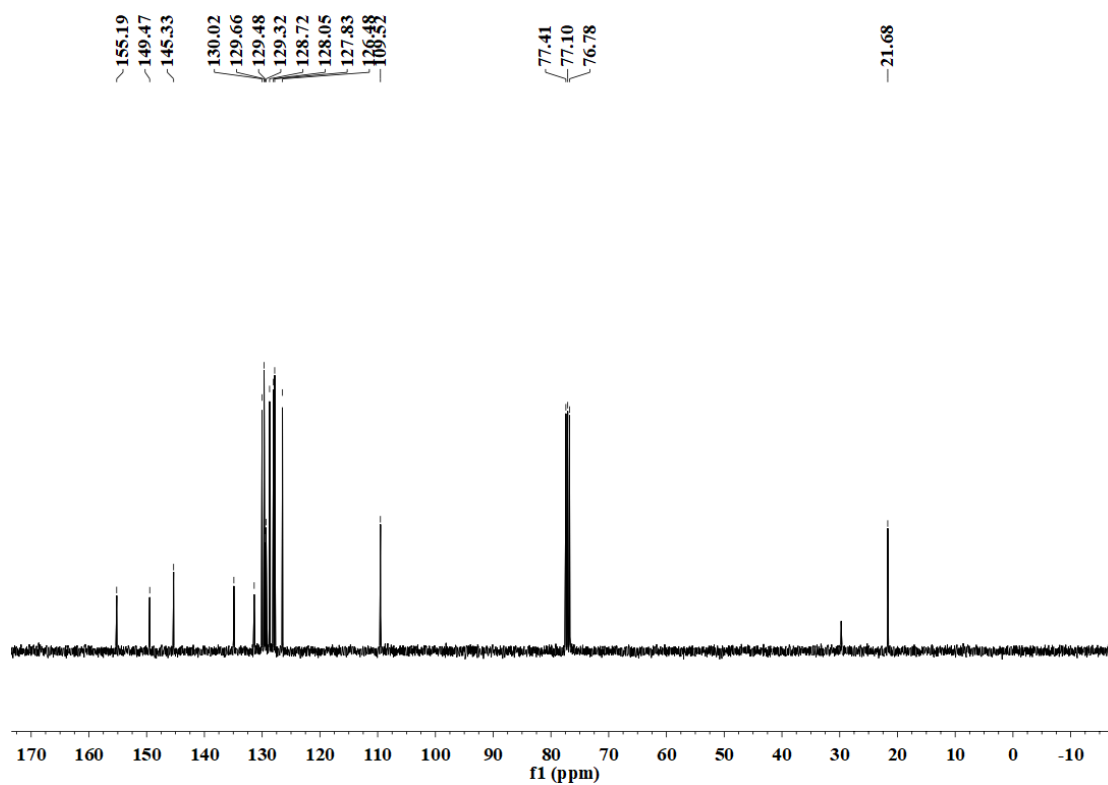

**Figure S3  $^1\text{H}$  NMR Spectra of Compound of 2b**

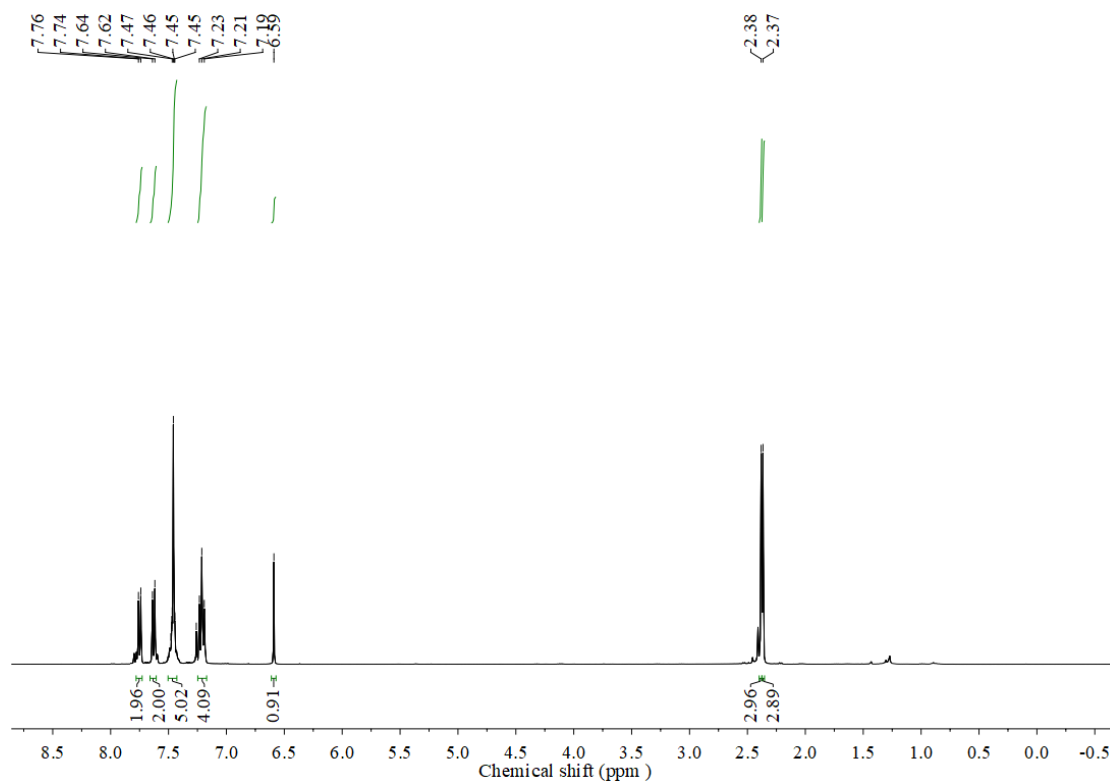

**Figure S4  $^{13}\text{C}$  NMR Spectra of Compound of 2b**

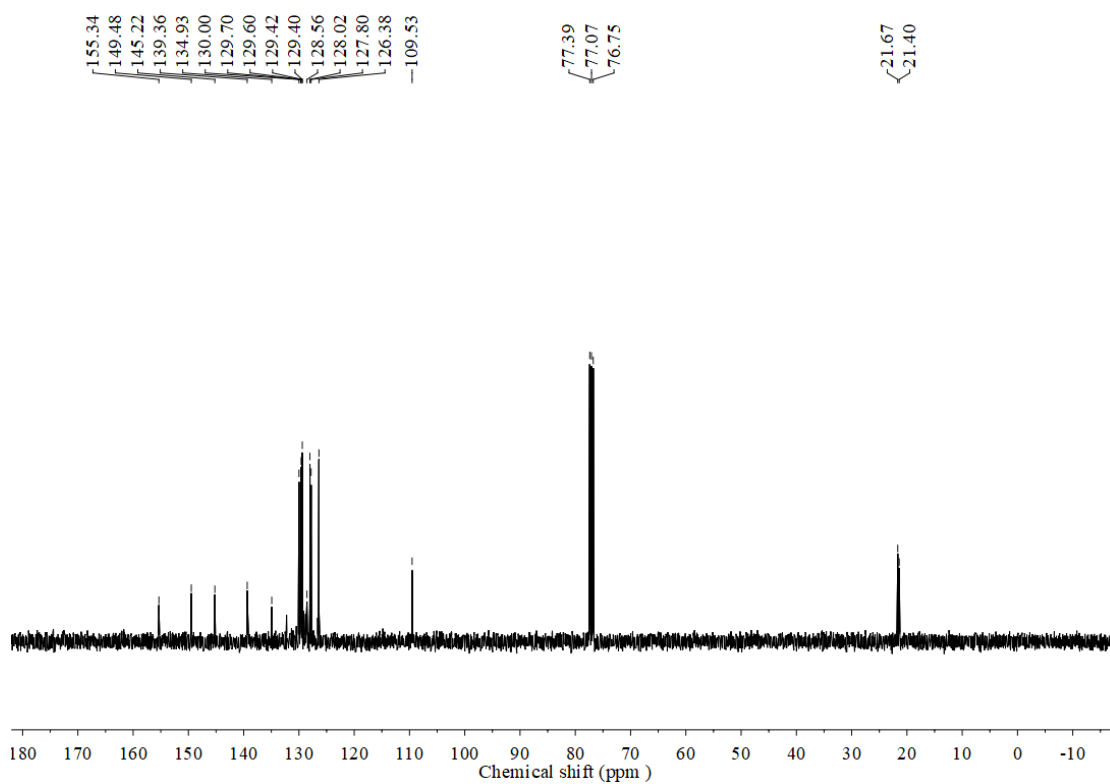

**Figure S5  $^1\text{H}$  NMR Spectra of Compound of 2c**

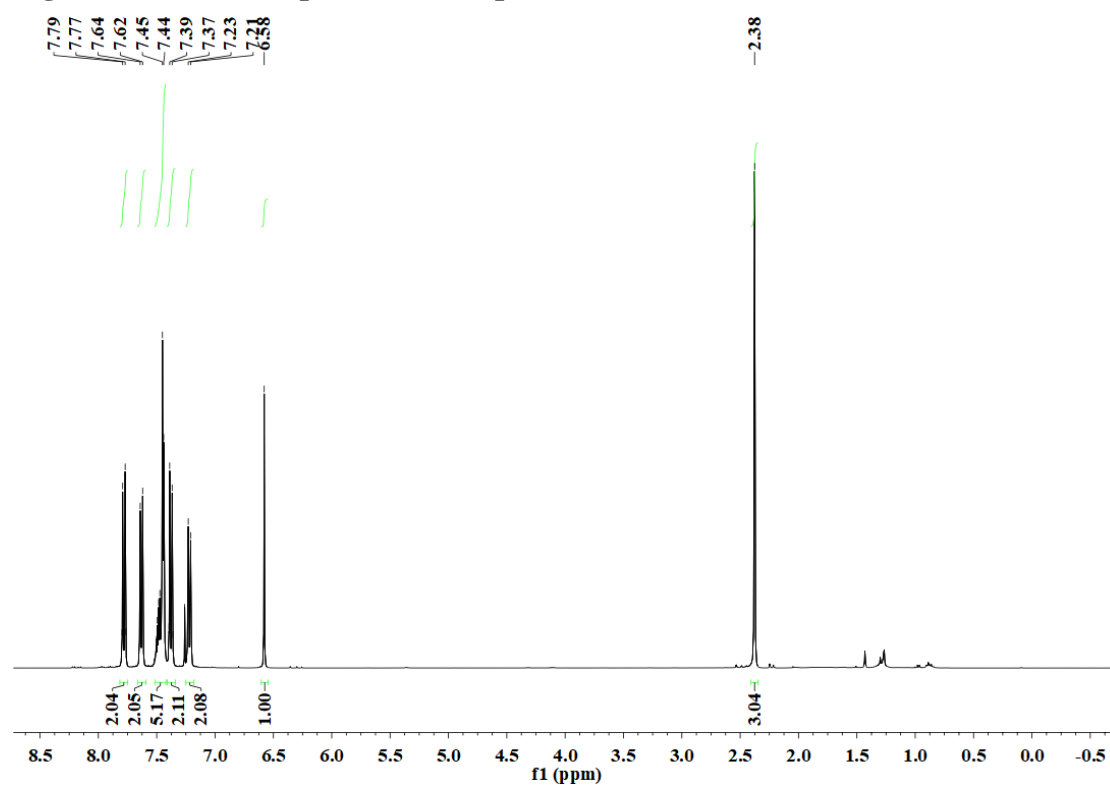

**Figure S6  $^{13}\text{C}$  NMR Spectra of Compound of 2c**

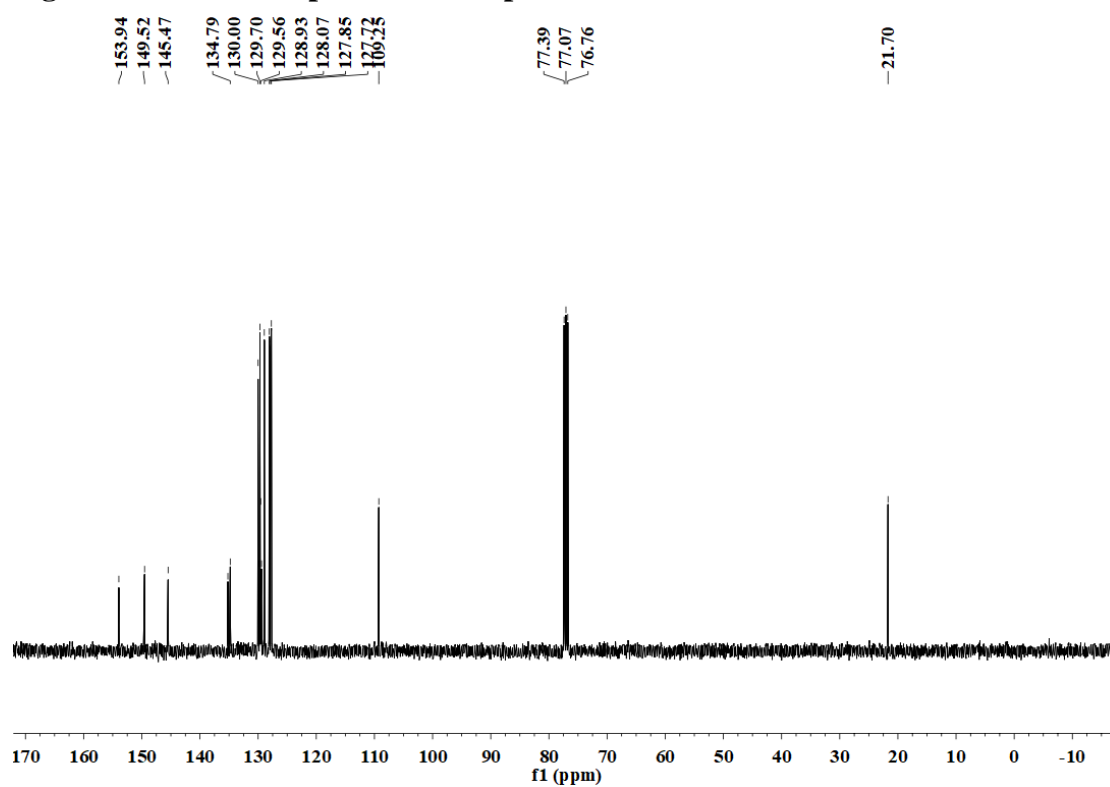

**Figure S7  $^1\text{H}$  NMR Spectra of Compound of 2d**

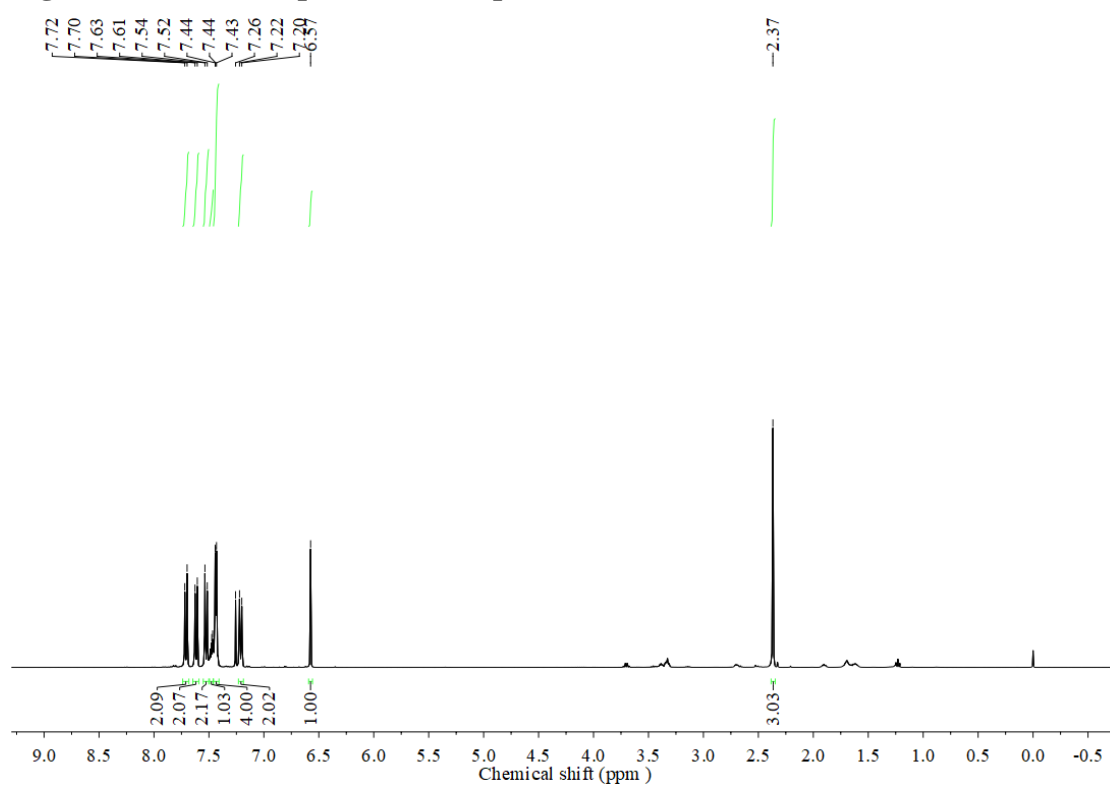

**Figure S8  $^{13}\text{C}$  NMR Spectra of Compound of 2d**

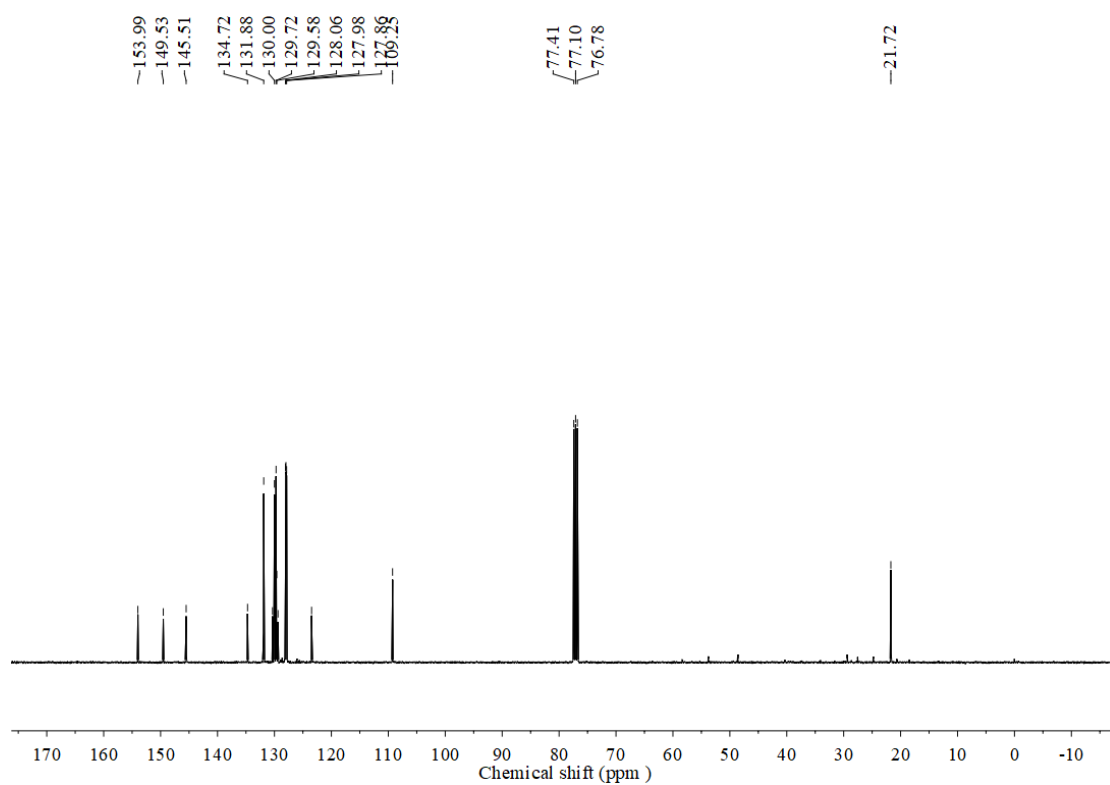

**Figure S9  $^1\text{H}$  NMR Spectra of Compound of 2e**

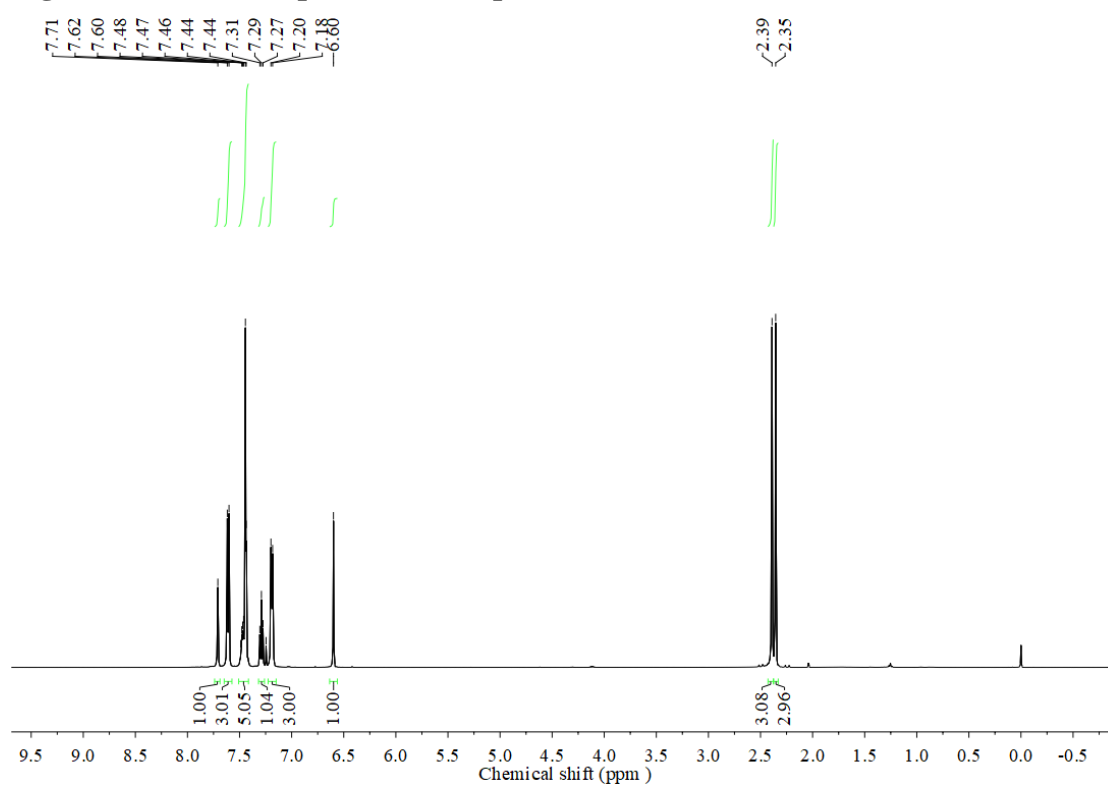

**Figure S10  $^{13}\text{C}$  NMR Spectra of Compound of 2e**

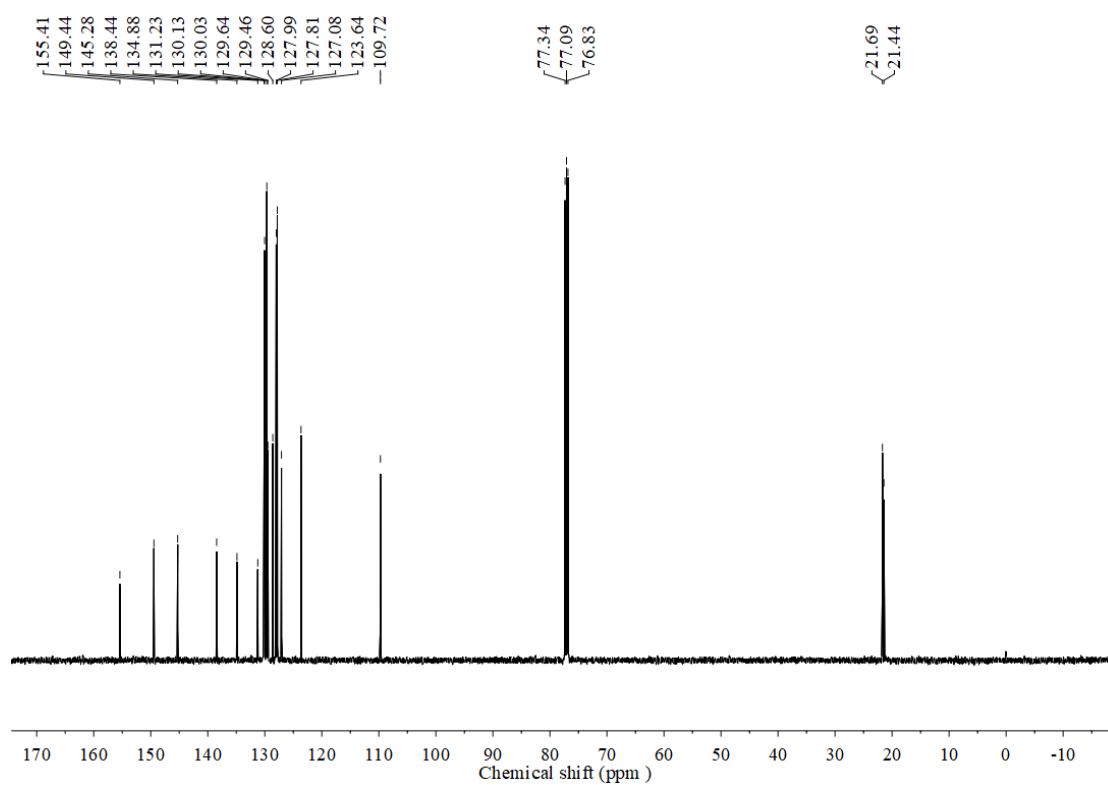



**Figure S11  $^1\text{H}$  NMR Spectra of Compound of 2f**

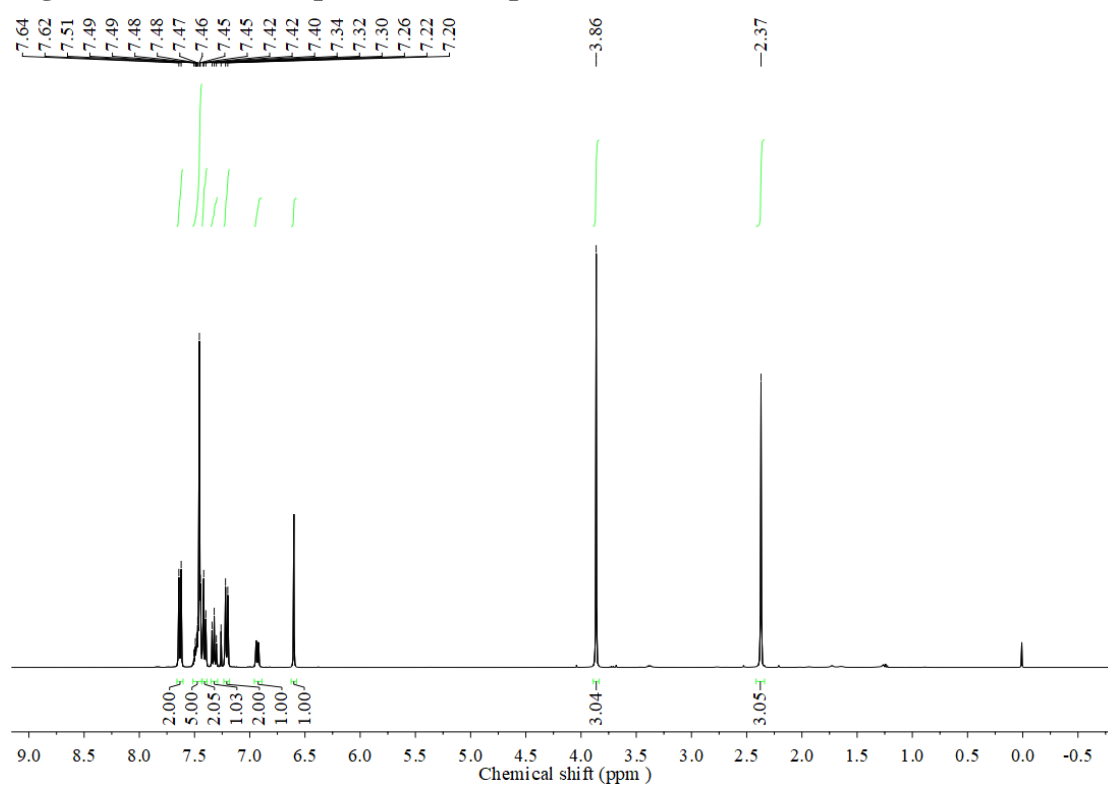

**Figure S12  $^{13}\text{C}$  NMR Spectra of Compound of 2f**

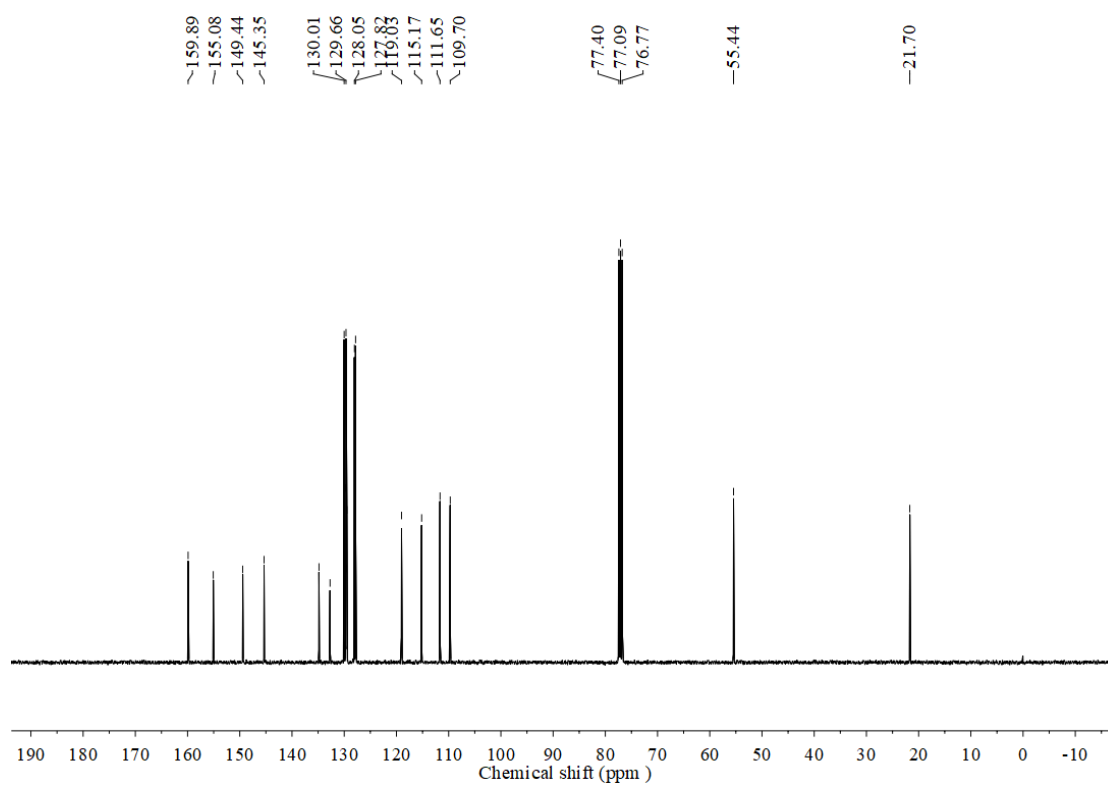

**Figure S13  $^1\text{H}$  NMR Spectra of Compound of 2g**

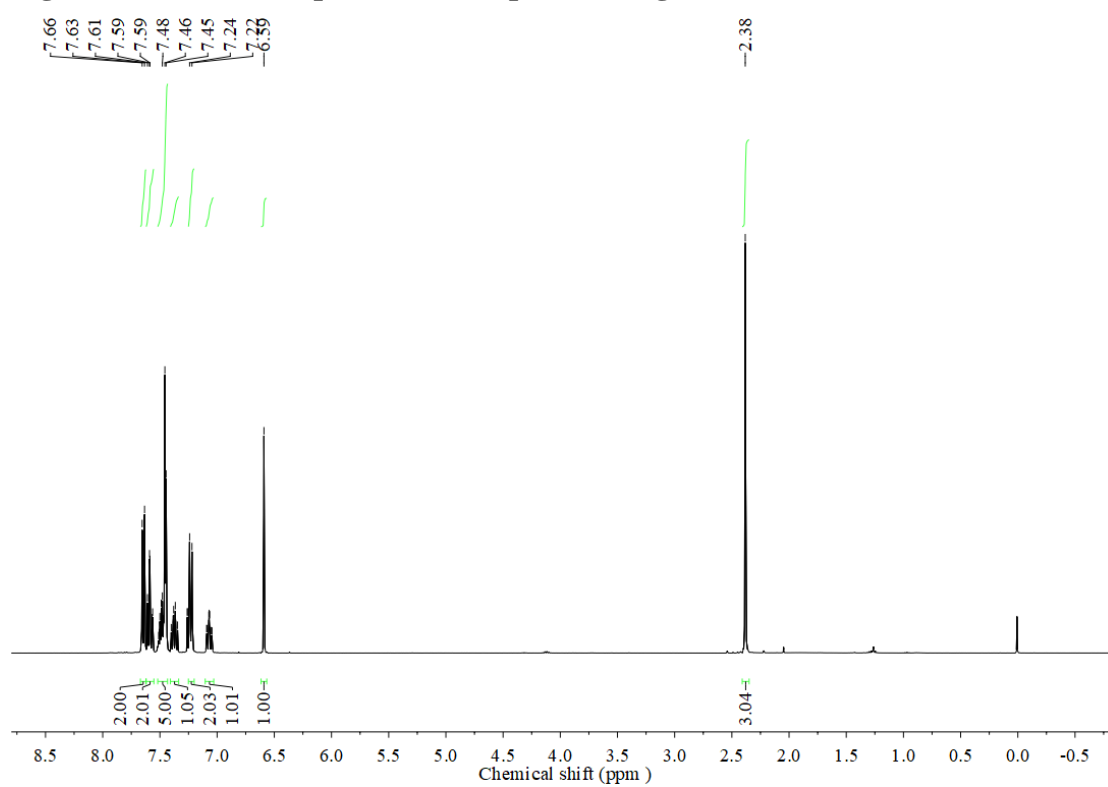

**Figure S14  $^{13}\text{C}$  NMR Spectra of Compound of 2g**

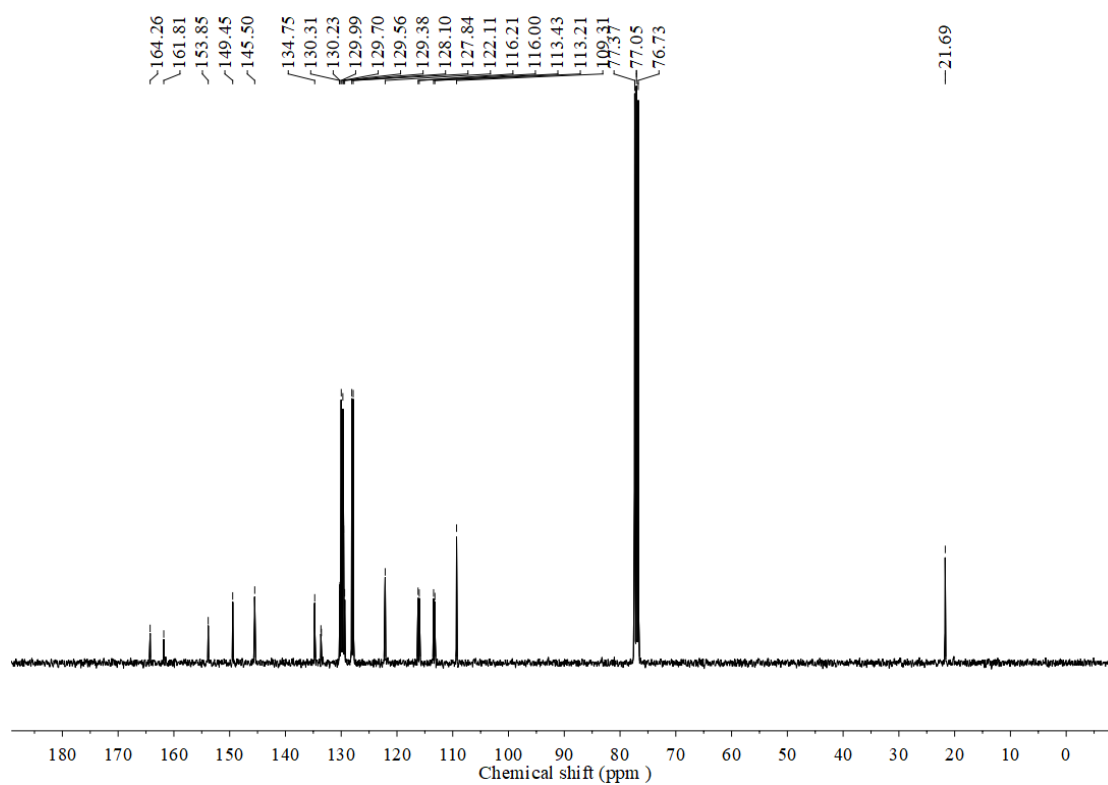

**Figure S15  $^1\text{H}$  NMR Spectra of Compound of 2h**

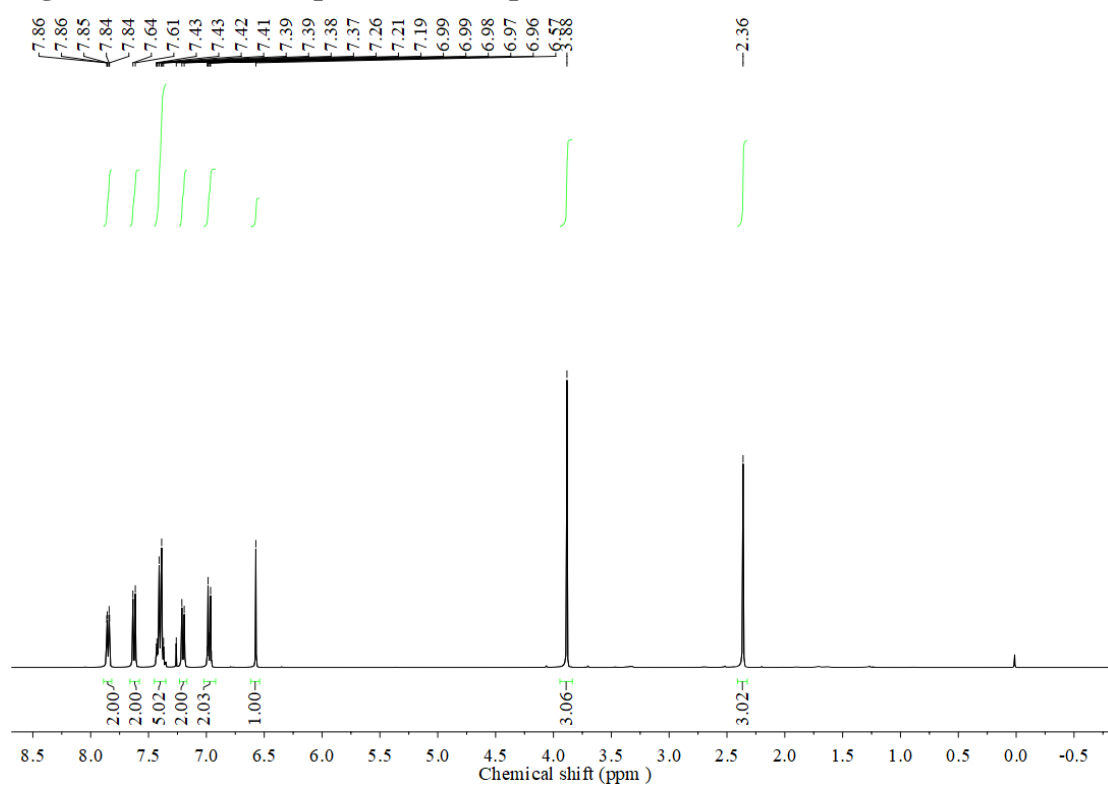

**Figure S16  $^{13}\text{C}$  NMR Spectra of Compound of 2h**

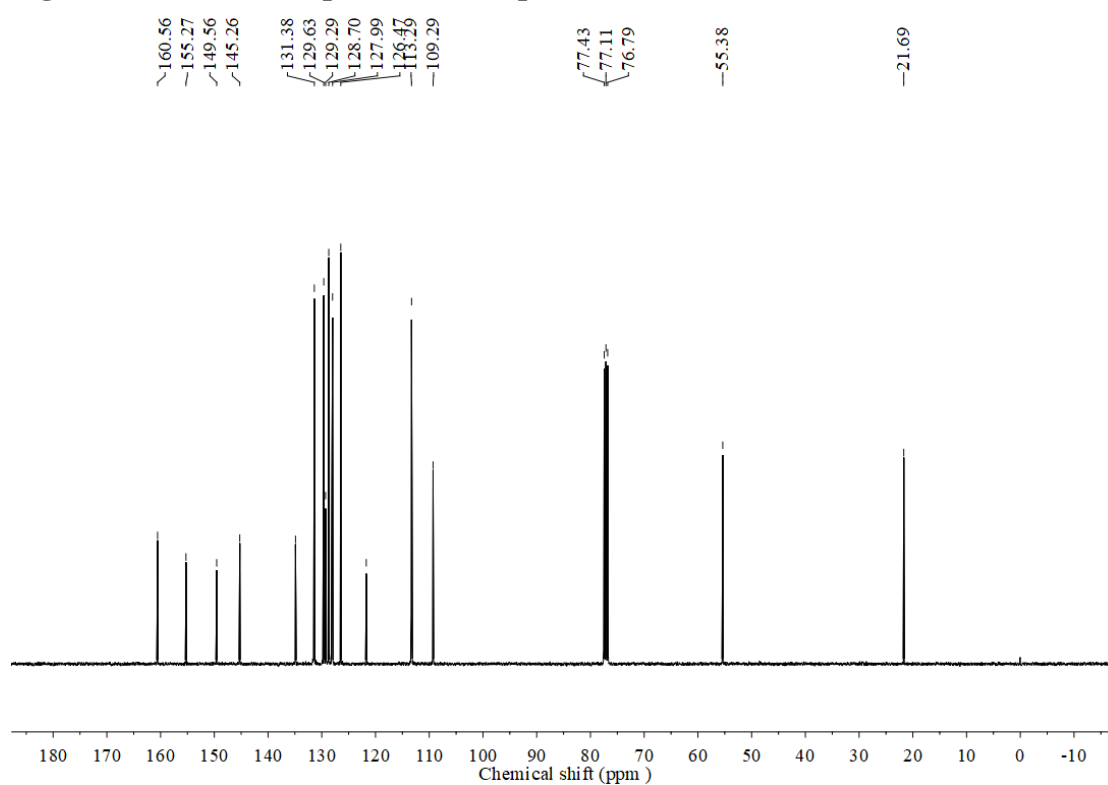

**Figure S17  $^1\text{H}$  NMR Spectra of Compound of 2i**

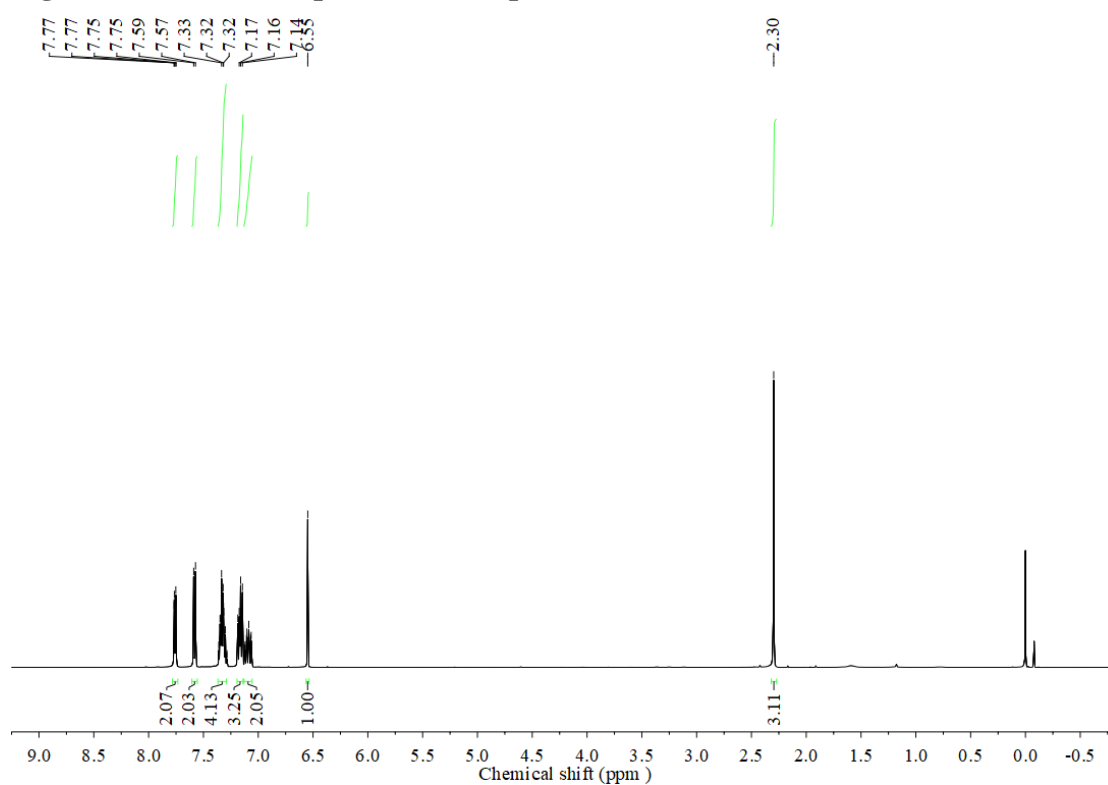

**Figure S18  $^{13}\text{C}$  NMR Spectra of Compound of 2i**

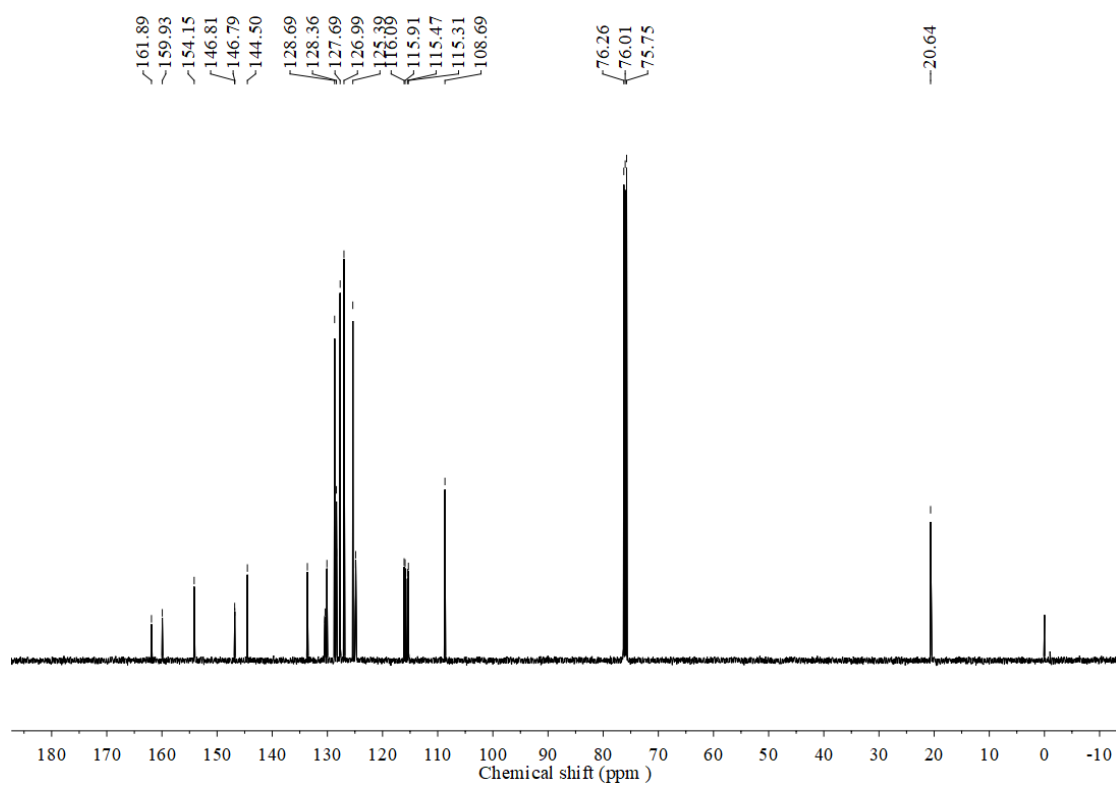

**Figure S19  $^1\text{H}$  NMR Spectra of Compound of 2j**

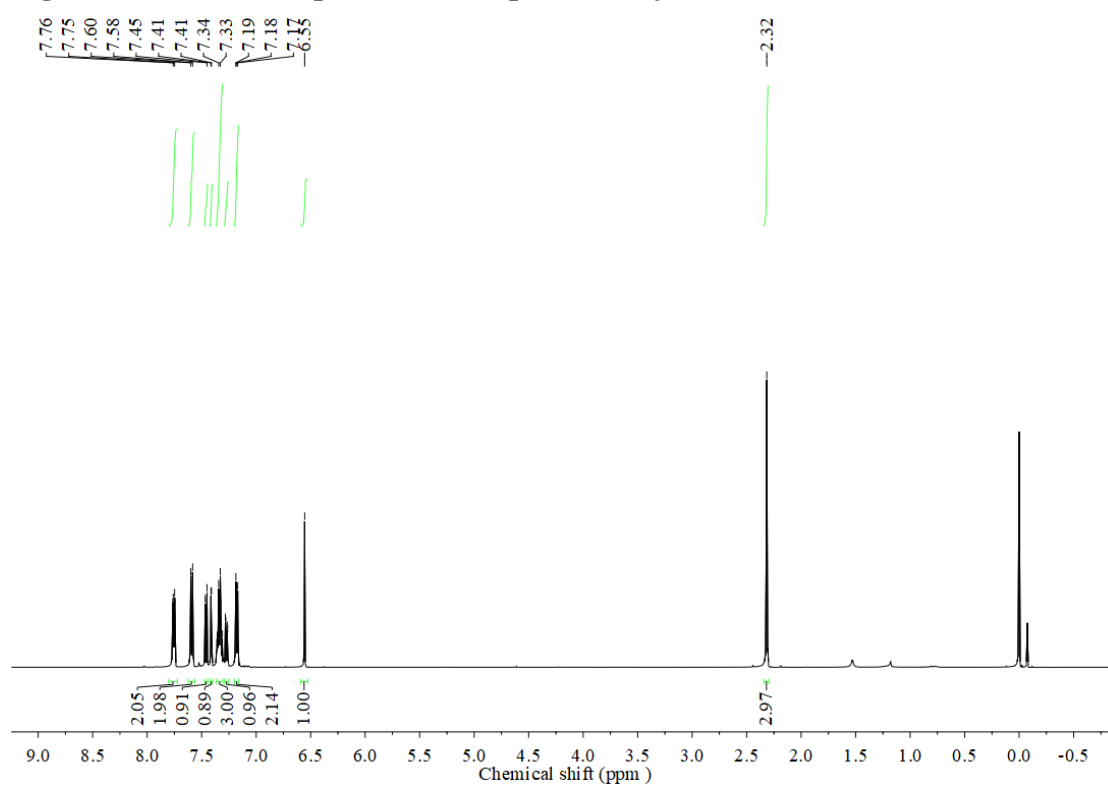

**Figure S20  $^{13}\text{C}$  NMR Spectra of Compound of 2j**

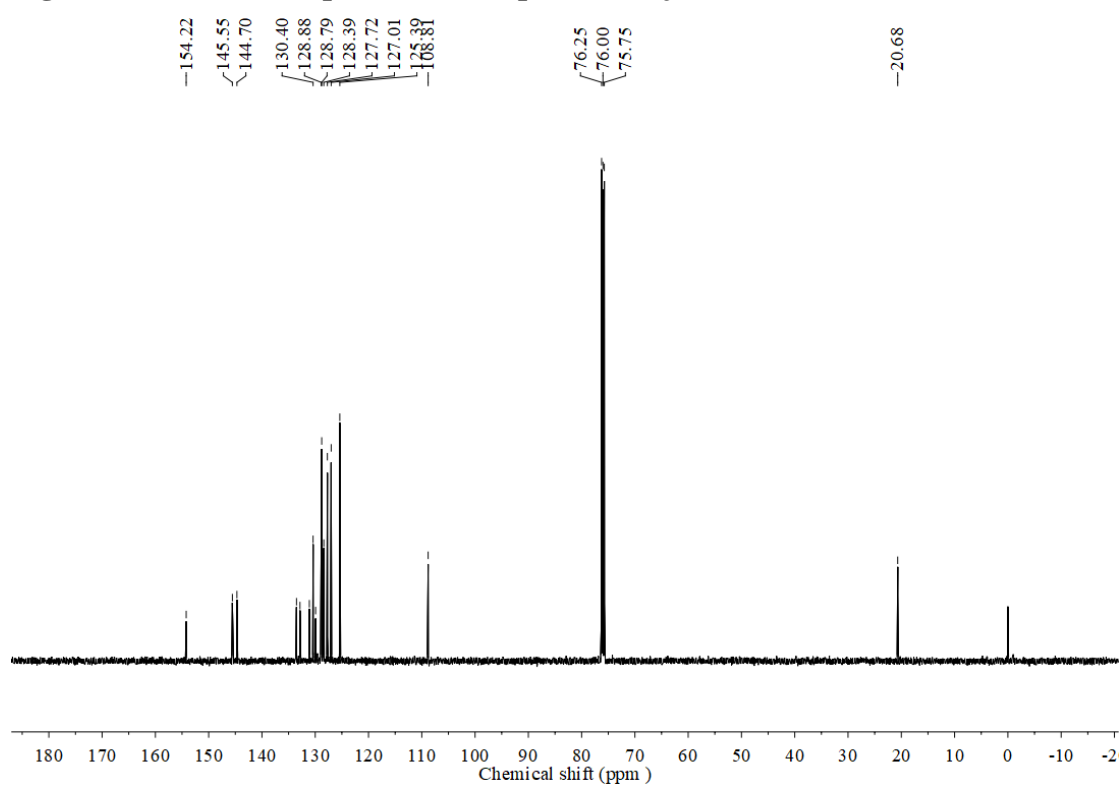

**Figure S21  $^1\text{H}$  NMR Spectra of Compound of 2k**

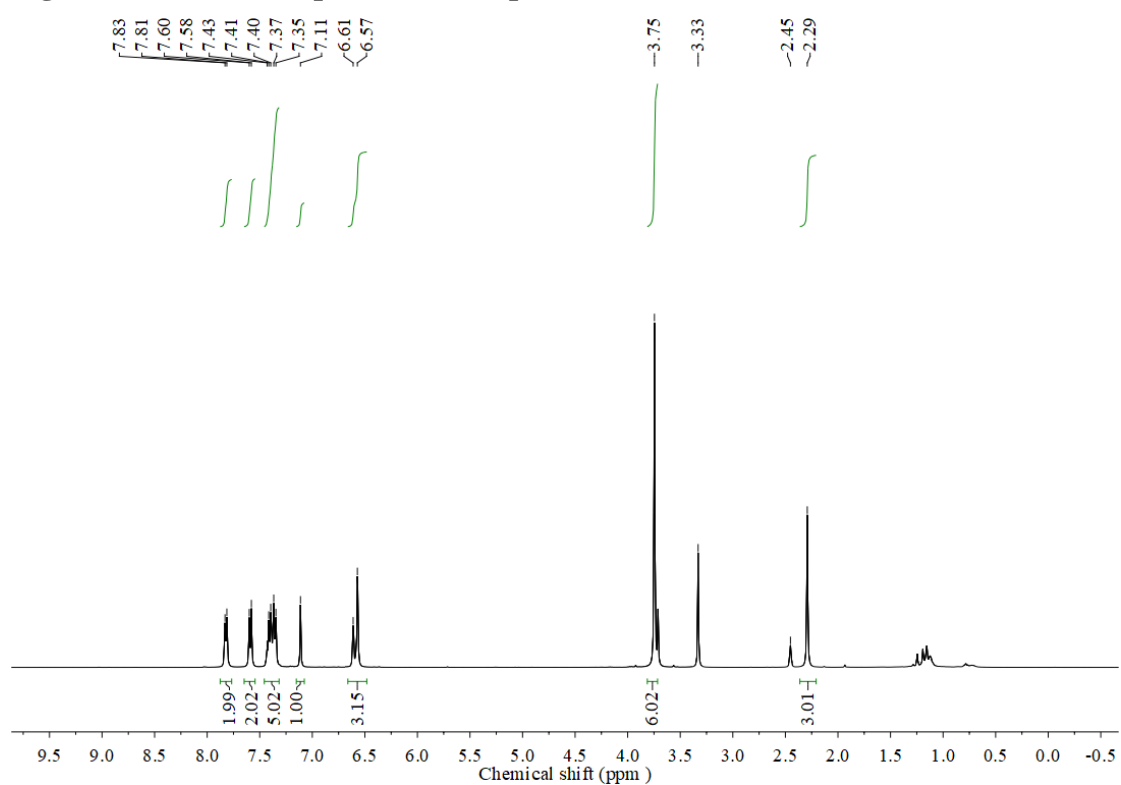

**Figure S22  $^{13}\text{C}$  NMR Spectra of Compound of 2k**

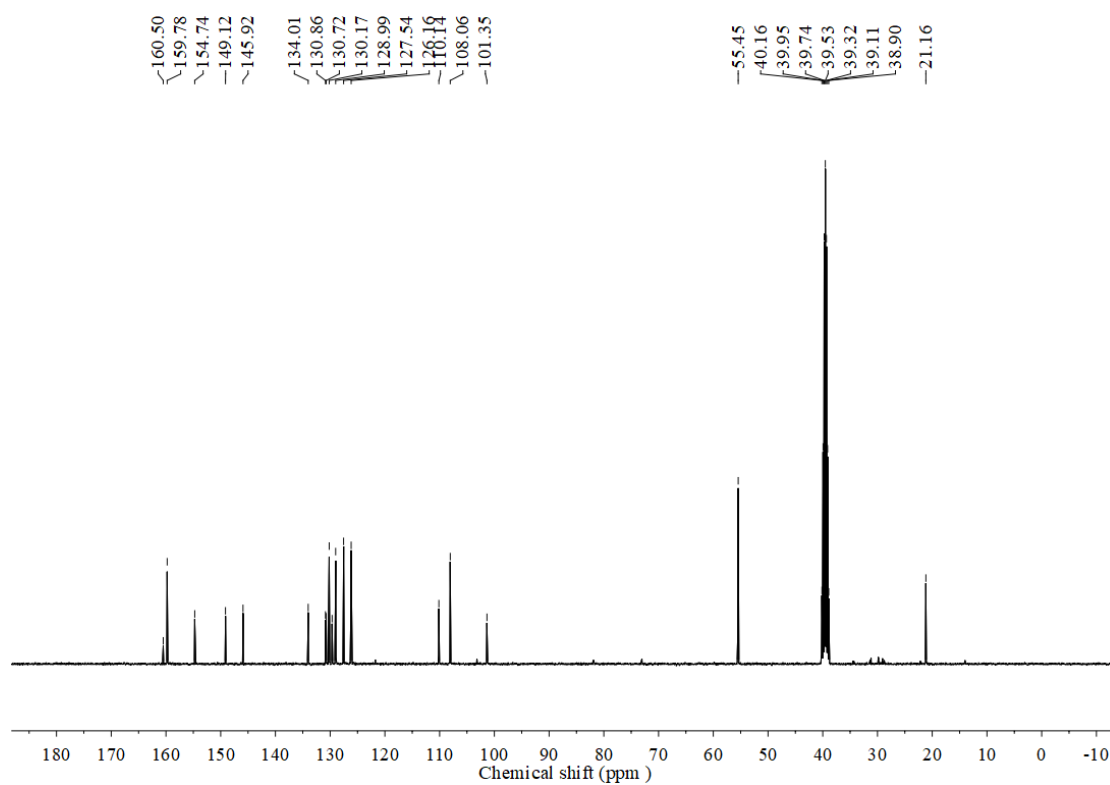

**Figure S23  $^1\text{H}$  NMR Spectra of Compound of 2l**

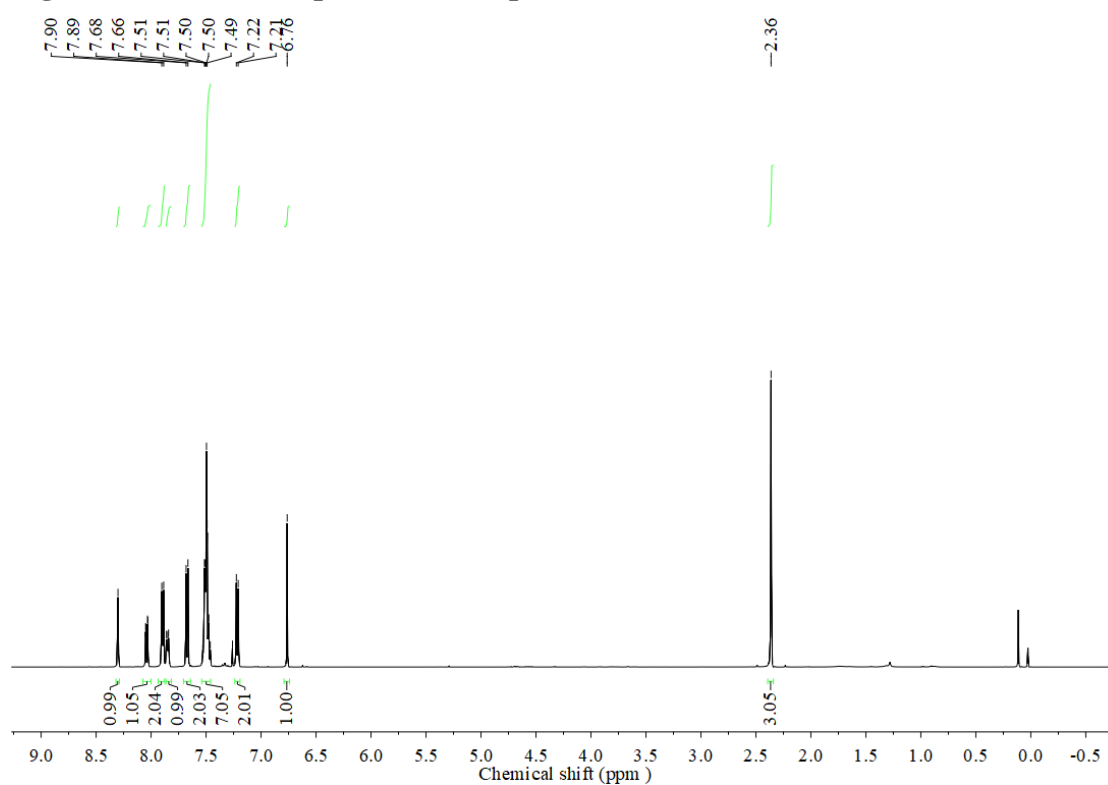

**Figure S24  $^{13}\text{C}$  NMR Spectra of Compound of 2l**

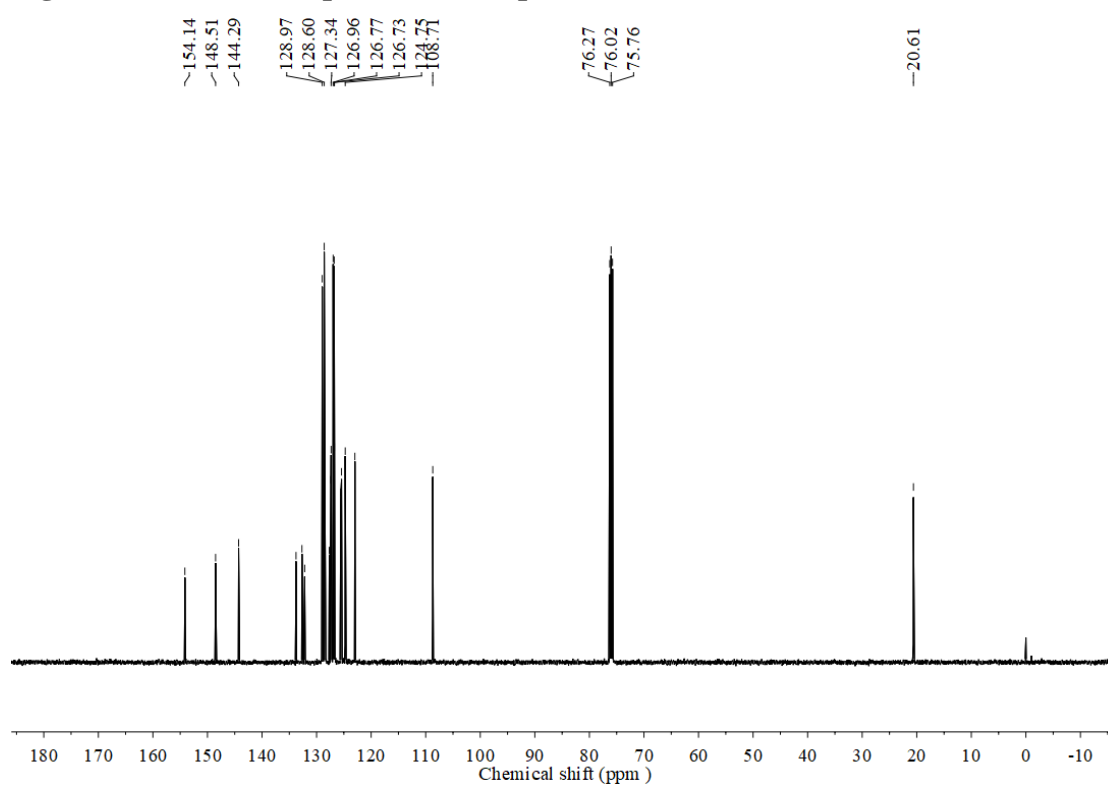

**Figure S25  $^1\text{H}$  NMR Spectra of Compound of 2m**

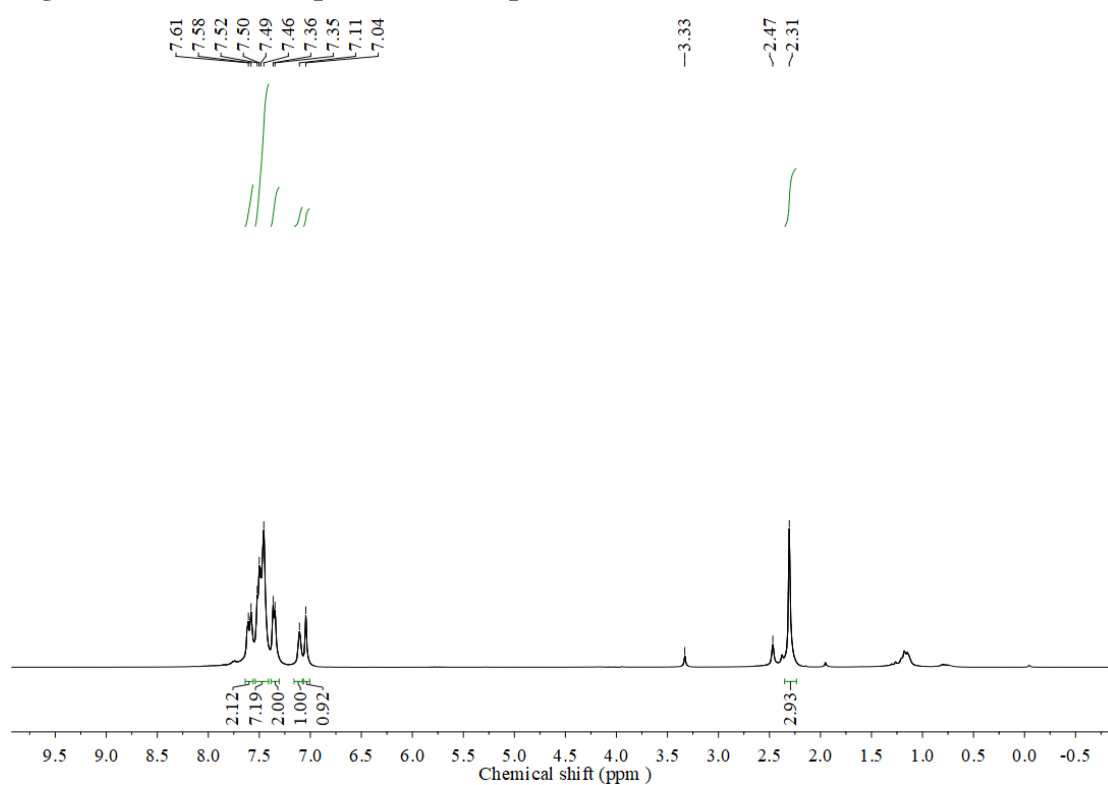

**Figure S26  $^{13}\text{C}$  NMR Spectra of Compound of 2m**

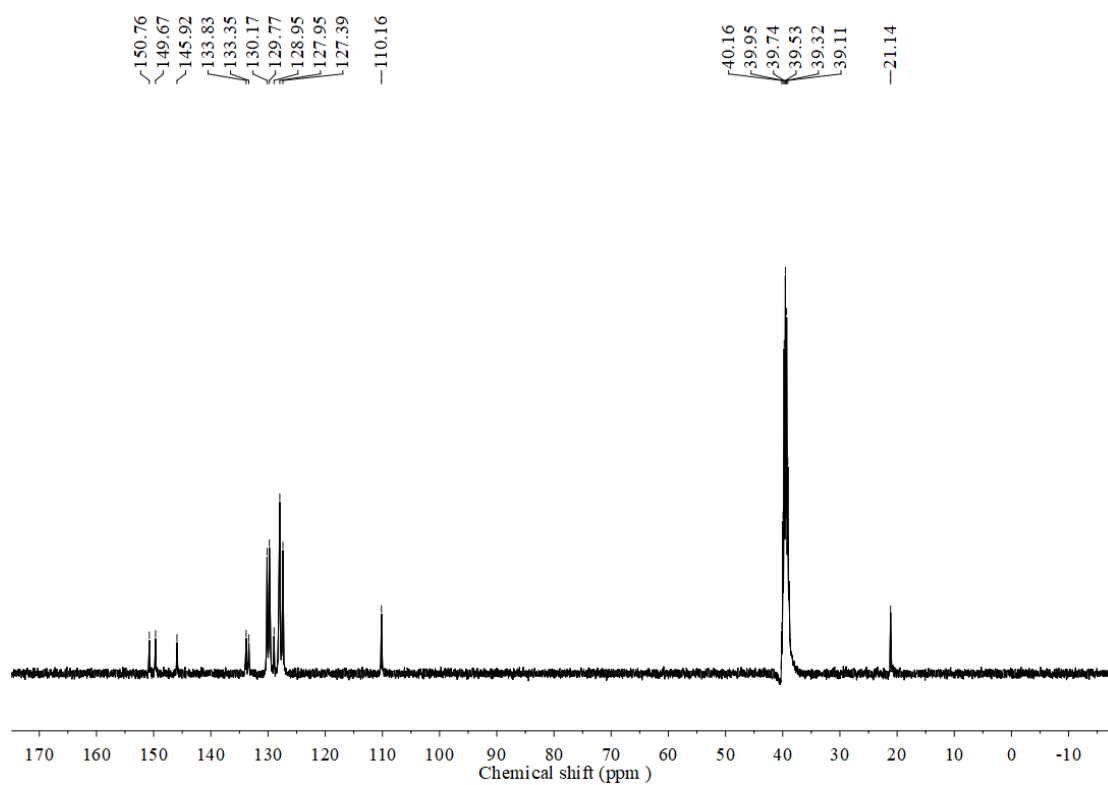



**Figure S27  $^1\text{H}$  NMR Spectra of Compound of 2n**

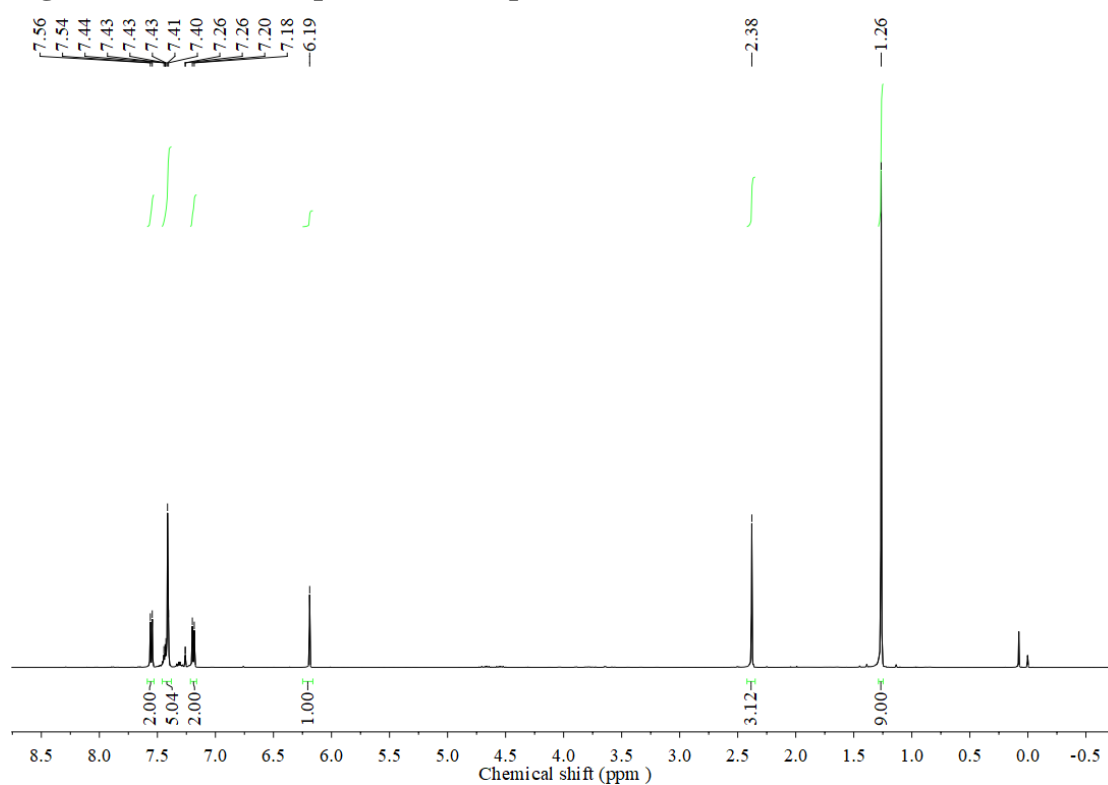

**Figure S28  $^{13}\text{C}$  NMR Spectra of Compound of 2n**

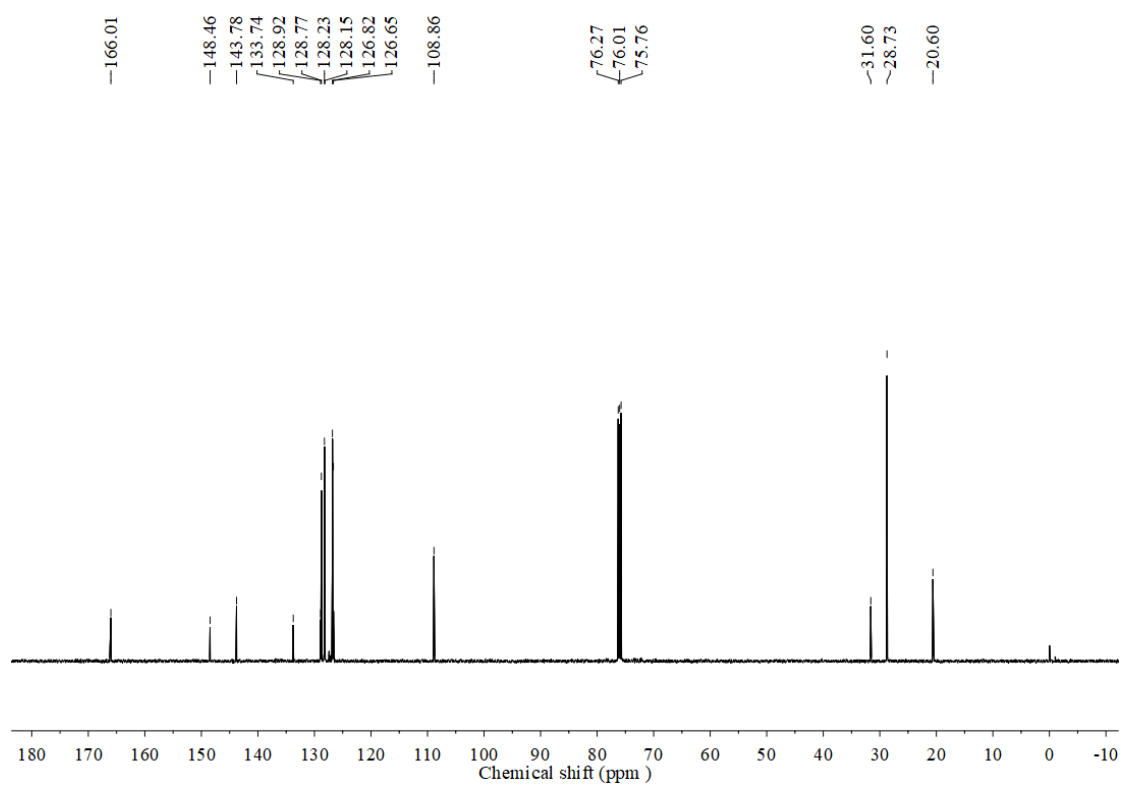

**Figure S29  $^1\text{H}$  NMR Spectra of Compound of 2o**

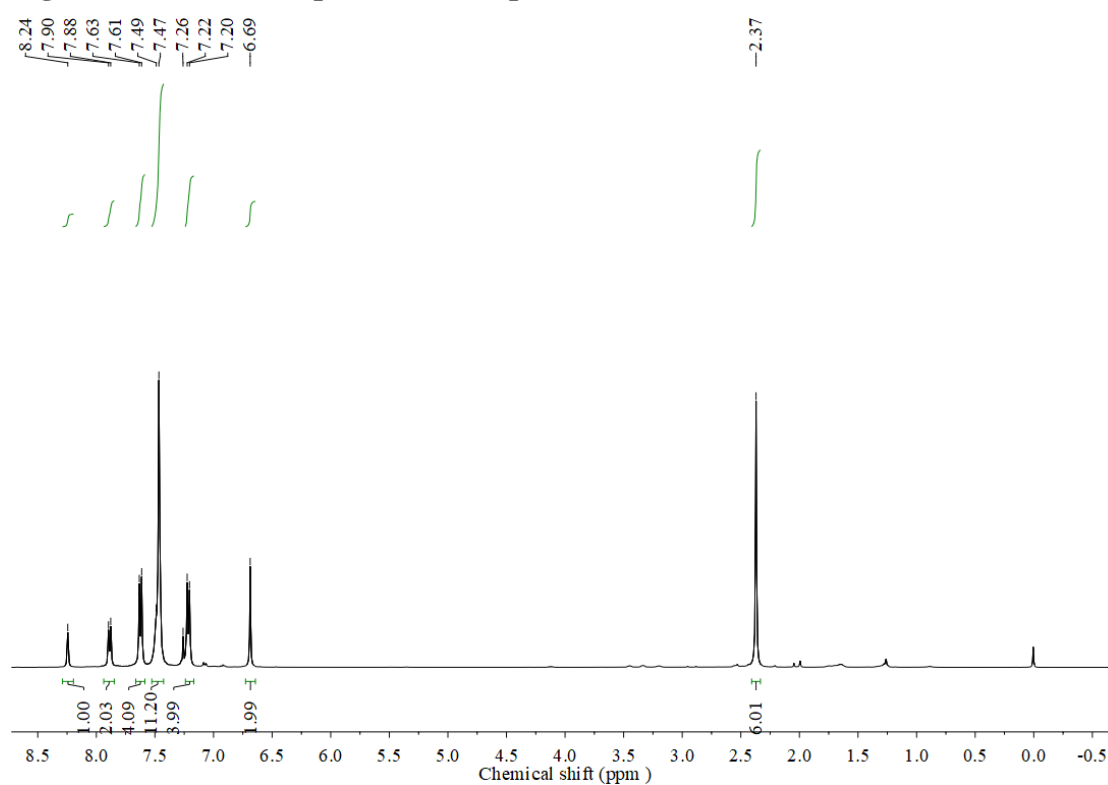

**Figure S30  $^{13}\text{C}$  NMR Spectra of Compound of 2o**

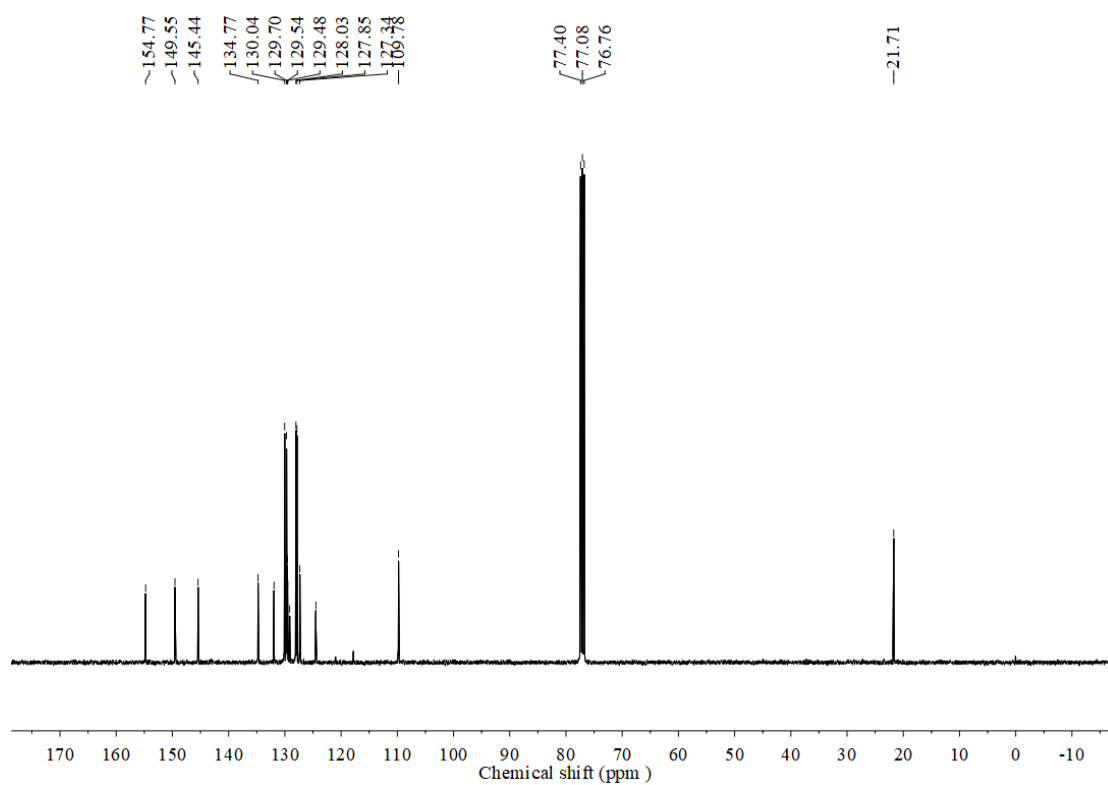

**Figure S31  $^1\text{H}$  NMR Spectra of Compound of 2p**

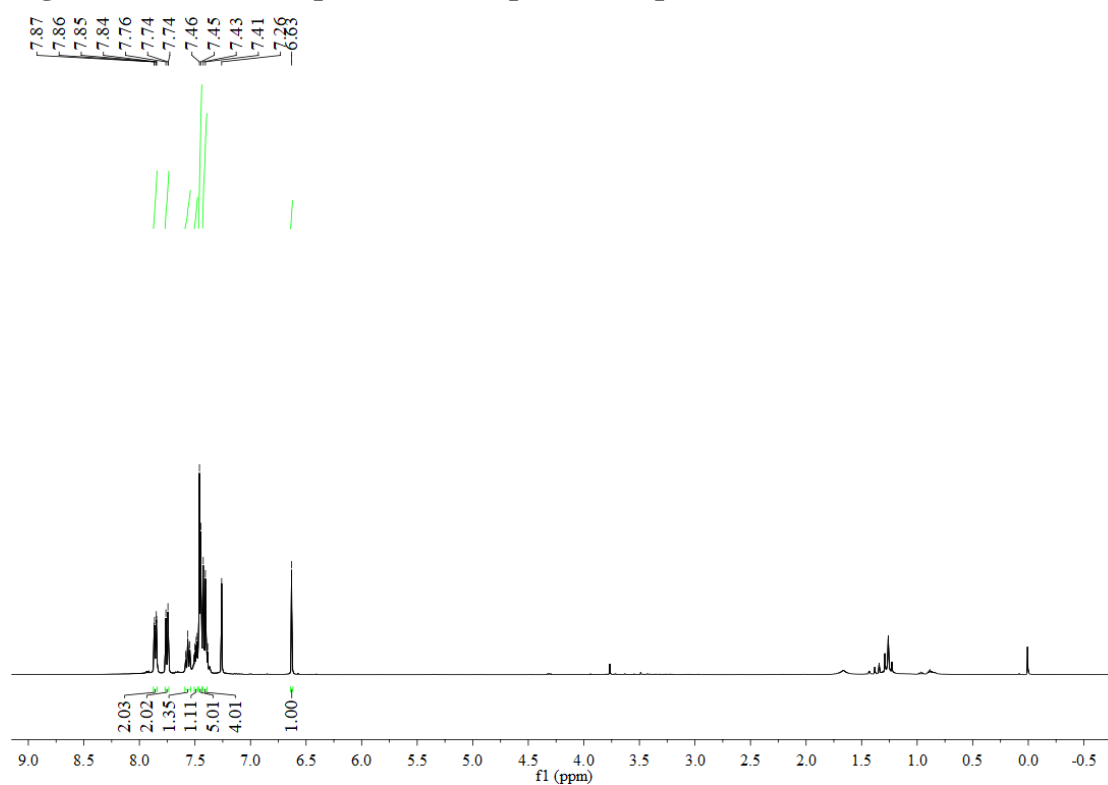

**Figure S32  $^{13}\text{C}$  NMR Spectra of Compound of 2p**

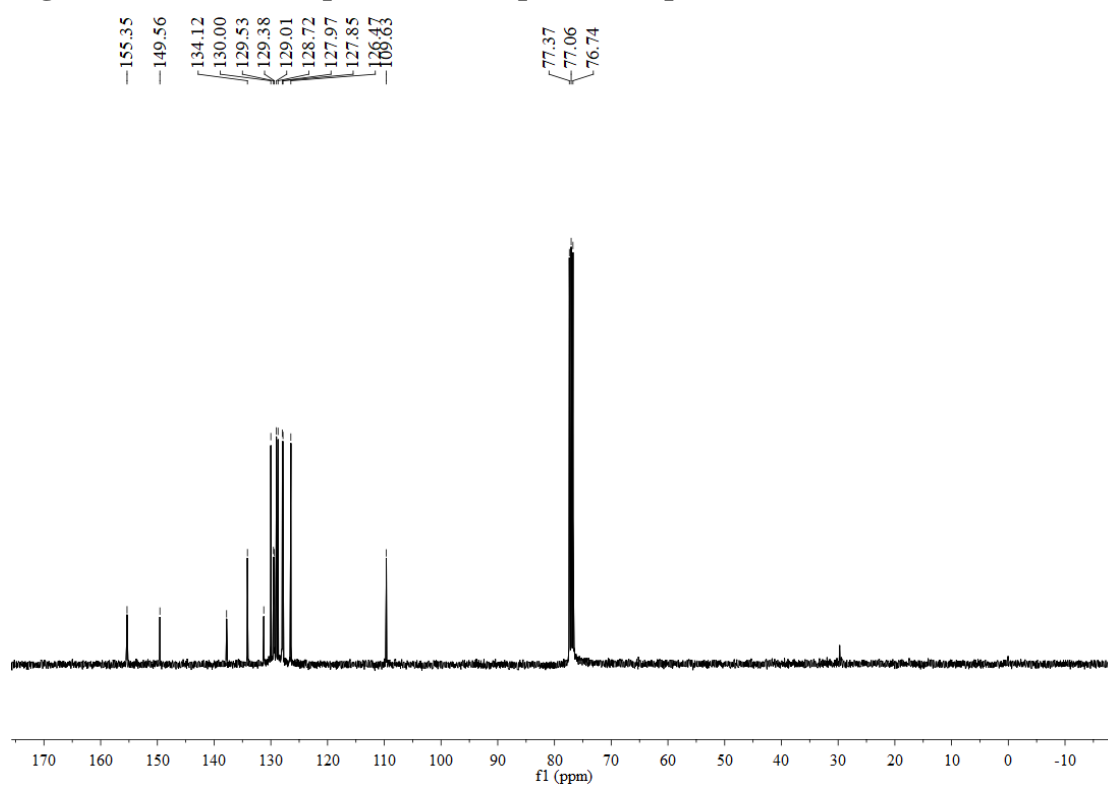

**Figure S33  $^1\text{H}$  NMR Spectra of Compound of 3a**

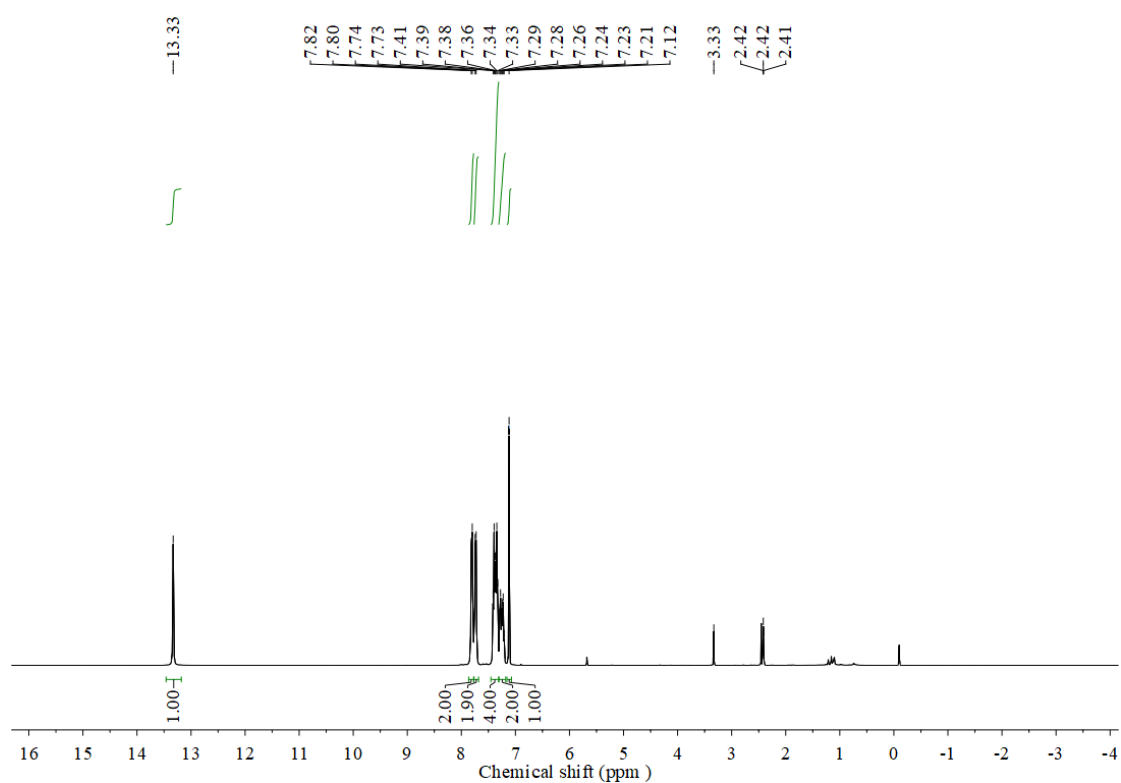

**Figure S34  $^{13}\text{C}$  NMR Spectra of Compound of 3a**

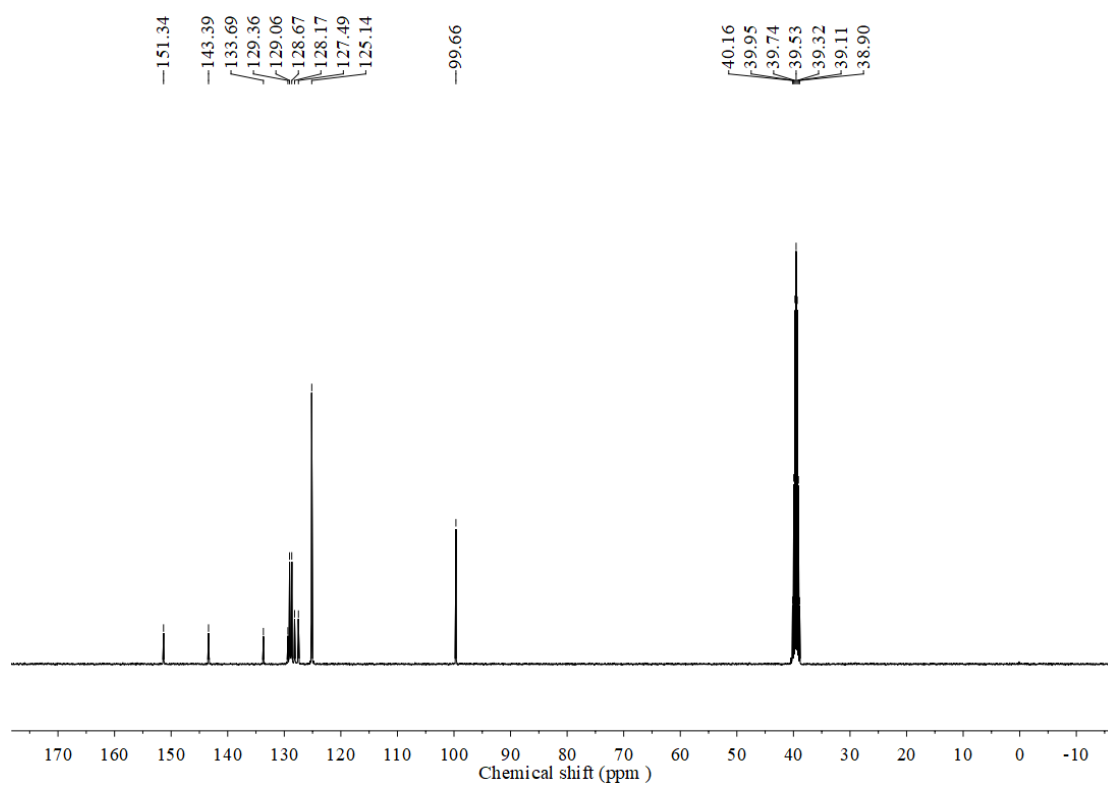

**Figure S35  $^1\text{H}$  NMR Spectra of Compound of 3b**

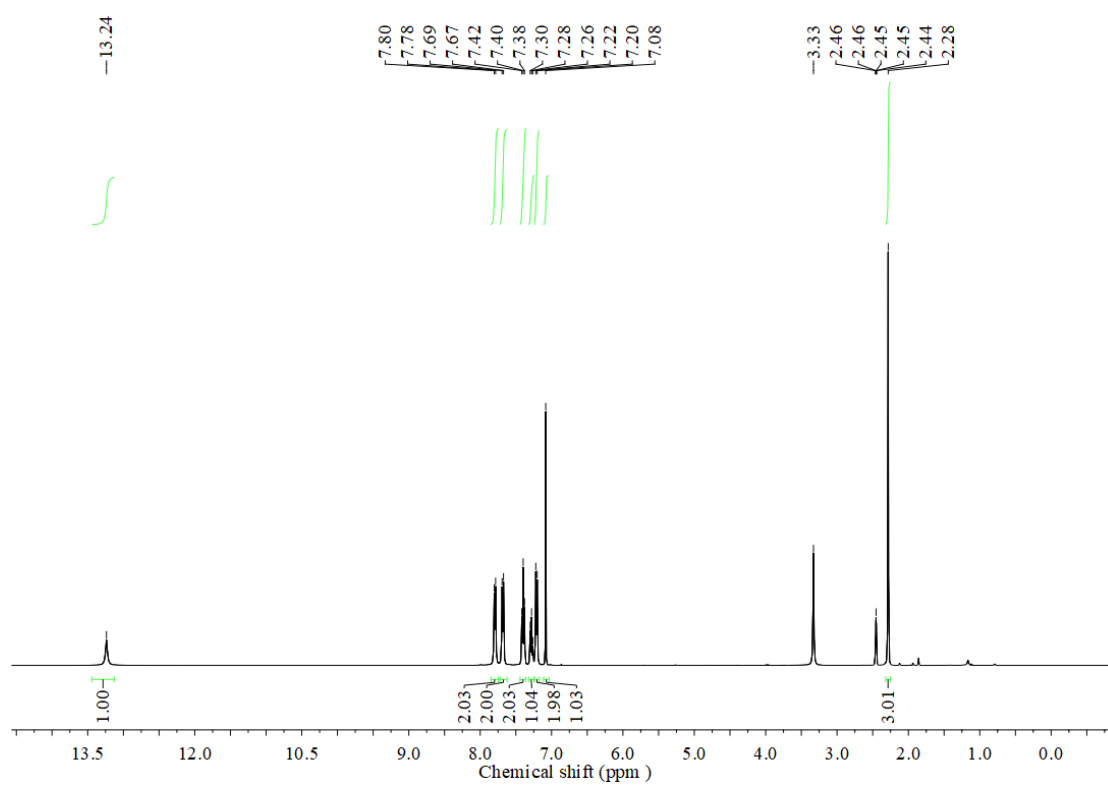

**Figure S36  $^{13}\text{C}$  NMR Spectra of Compound of 3b**

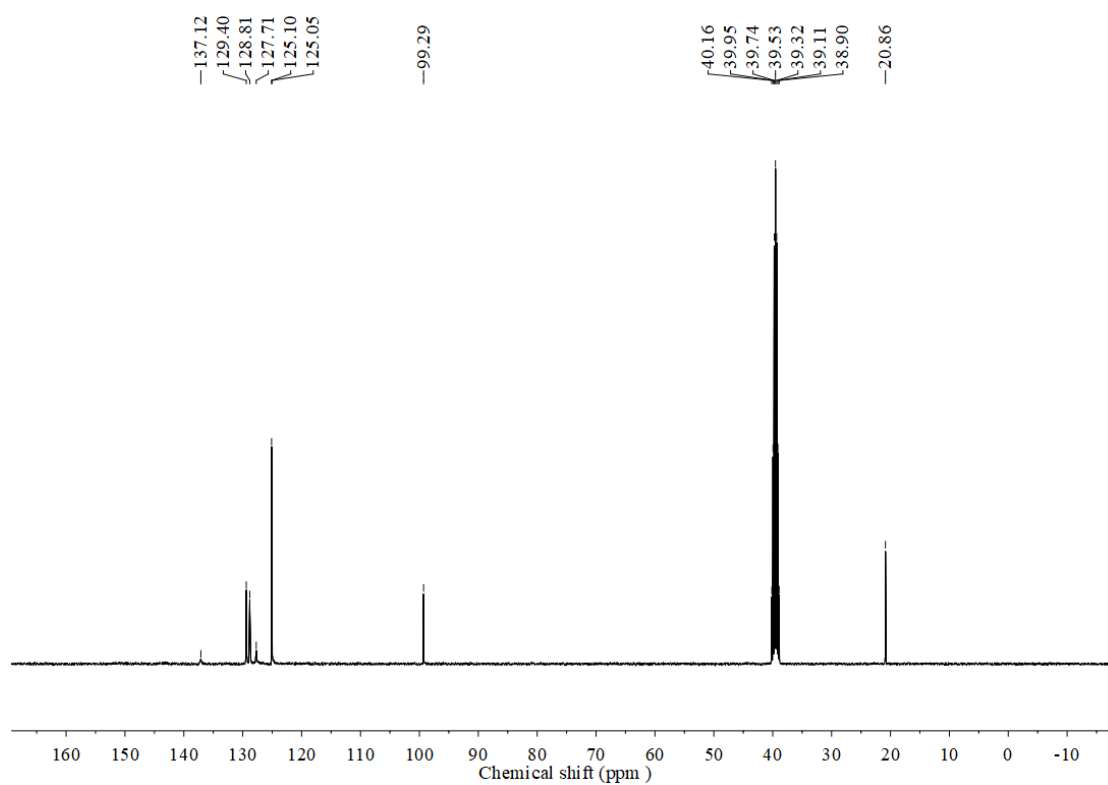

Figure S37  $^1\text{H}$  NMR Spectra of Compound of 3c

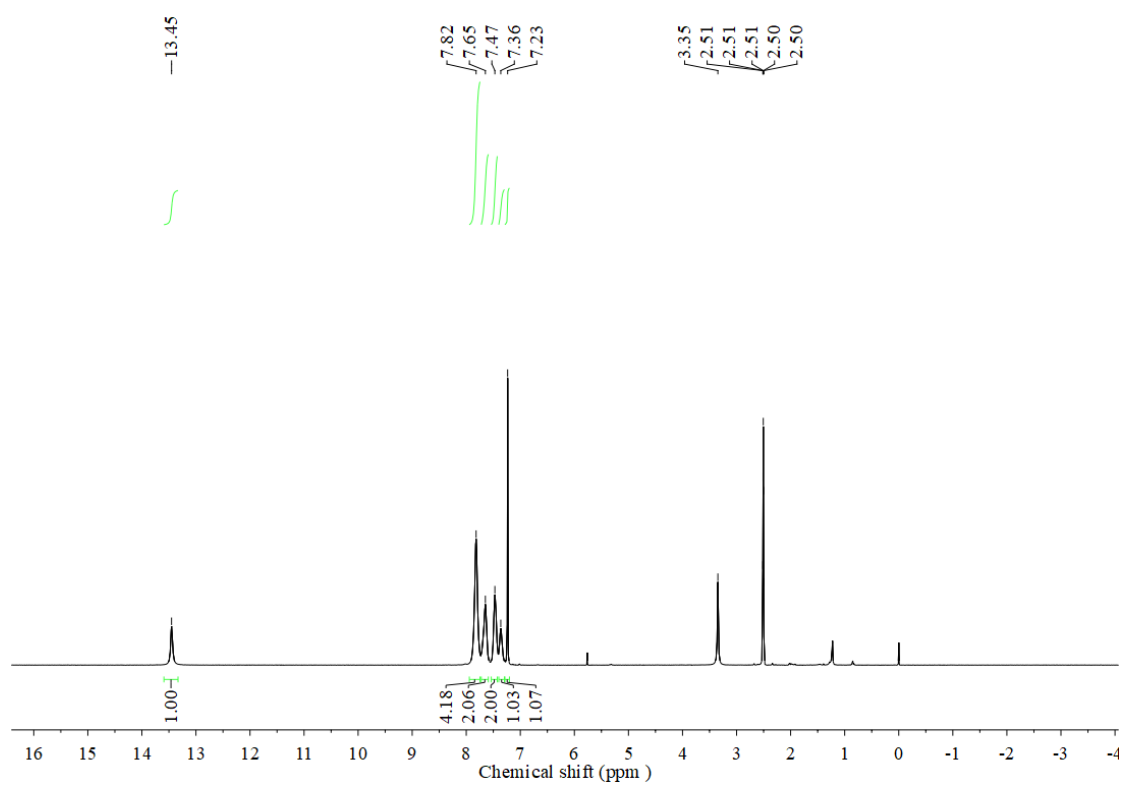

Figure S38  $^{13}\text{C}$  NMR Spectra of Compound of 3c

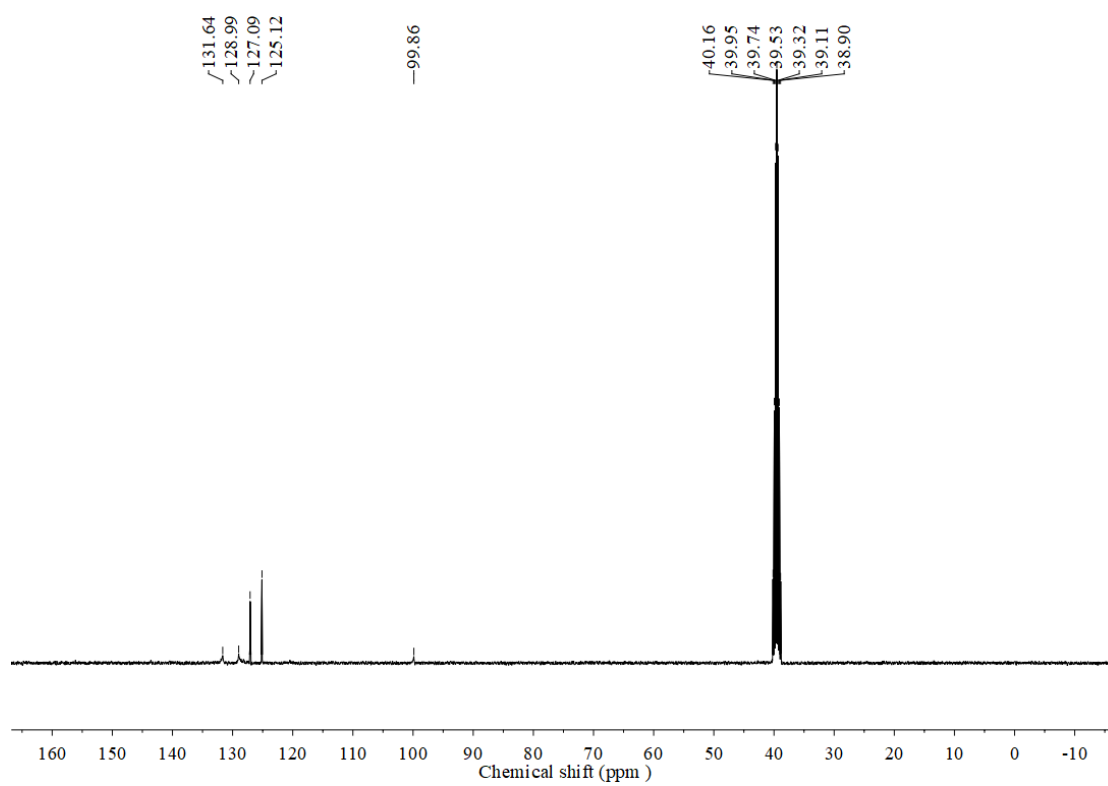

**Figure S39  $^1\text{H}$  NMR Spectra of Compound of 3d**

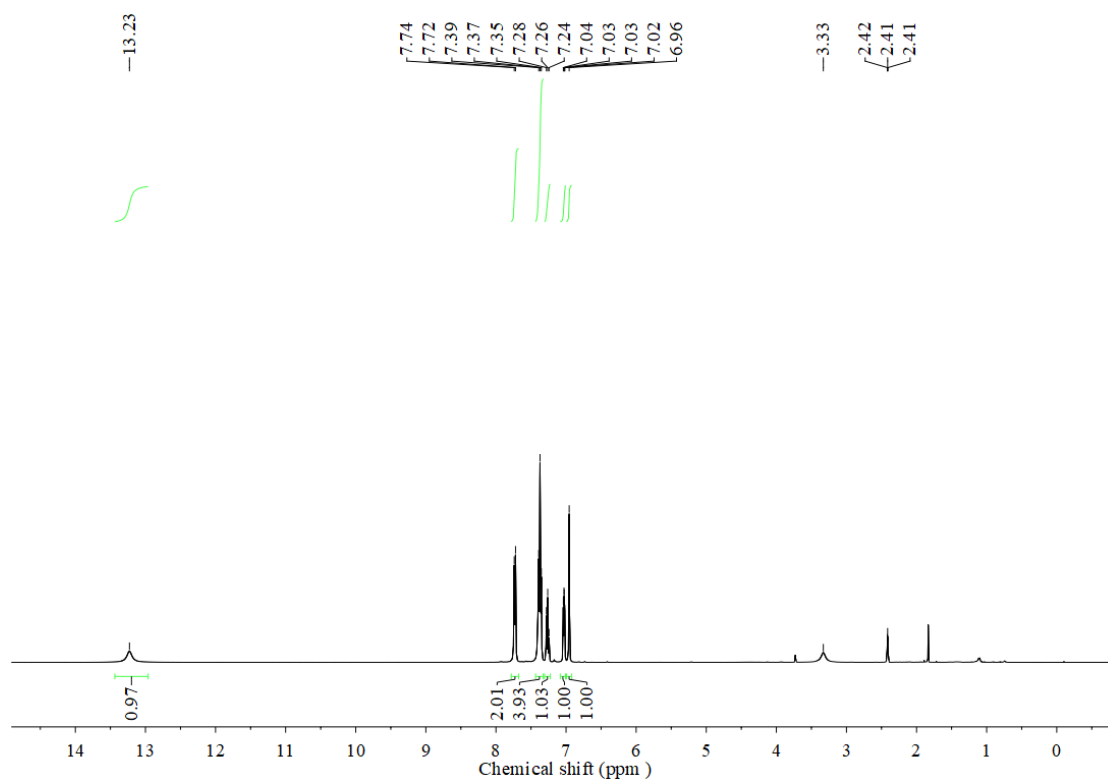

**Figure S40  $^{13}\text{C}$  NMR Spectra of Compound of 3d**

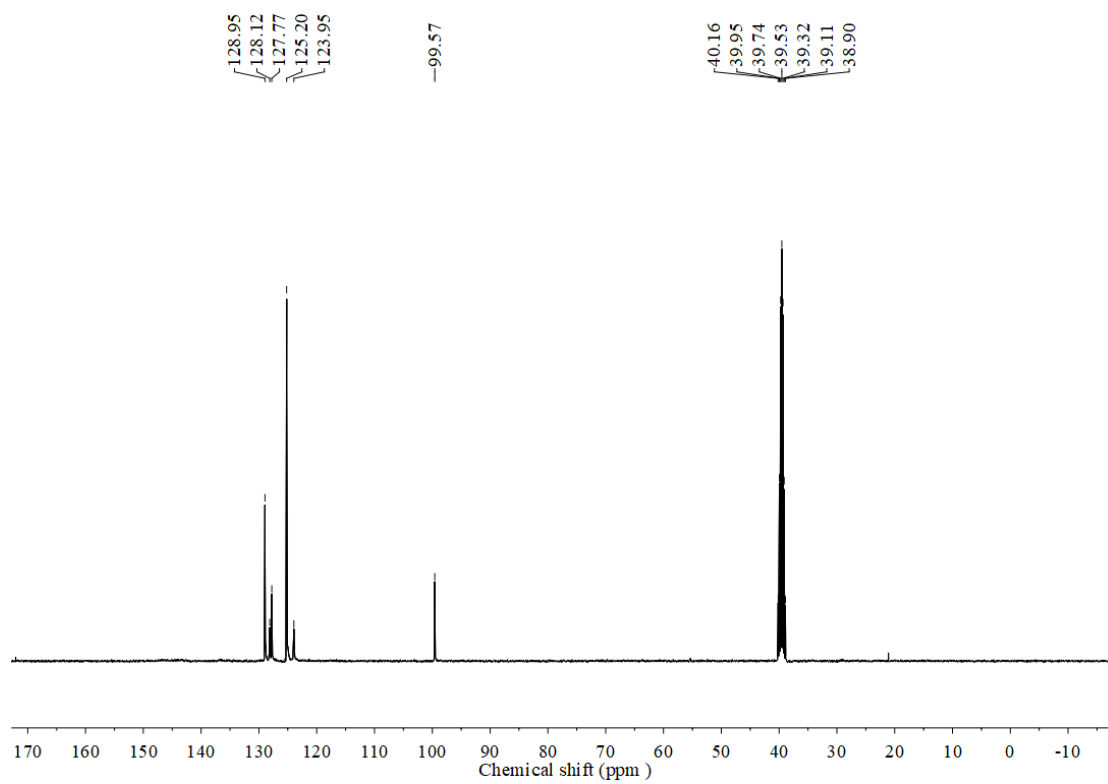

**Figure S41  $^1\text{H}$  NMR Spectra of Compound of 3e**

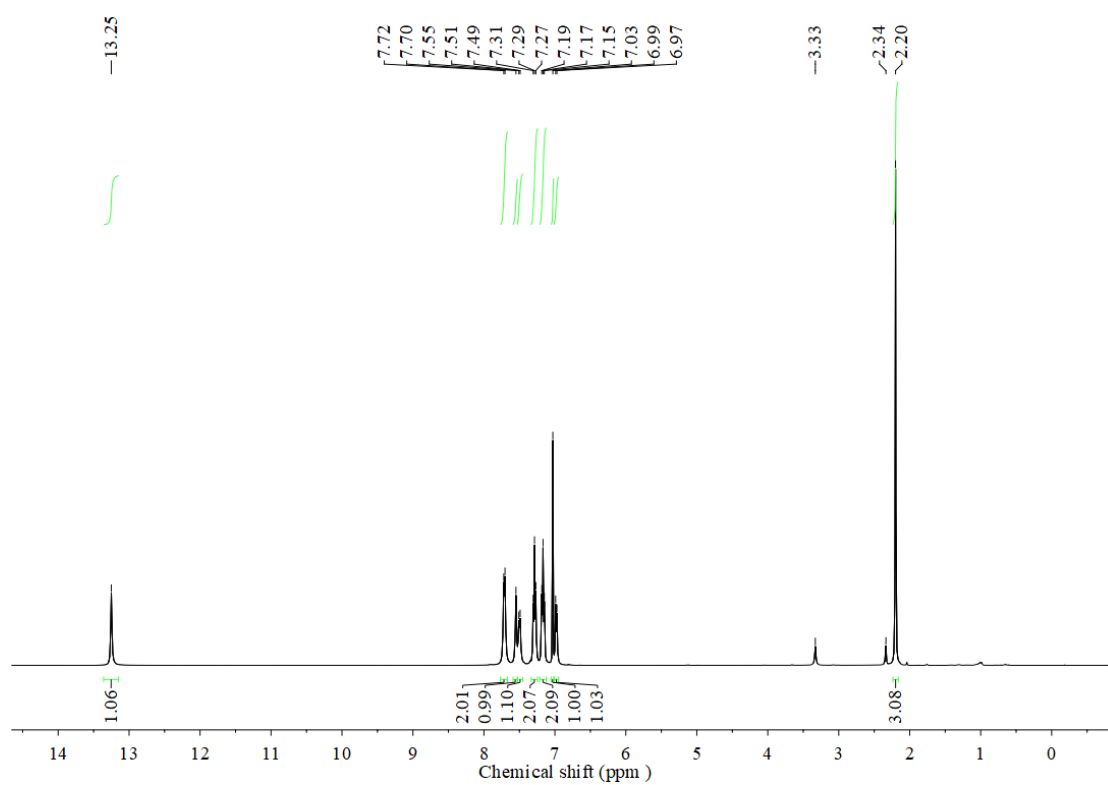

**Figure S42  $^{13}\text{C}$  NMR Spectra of Compound of 3e**

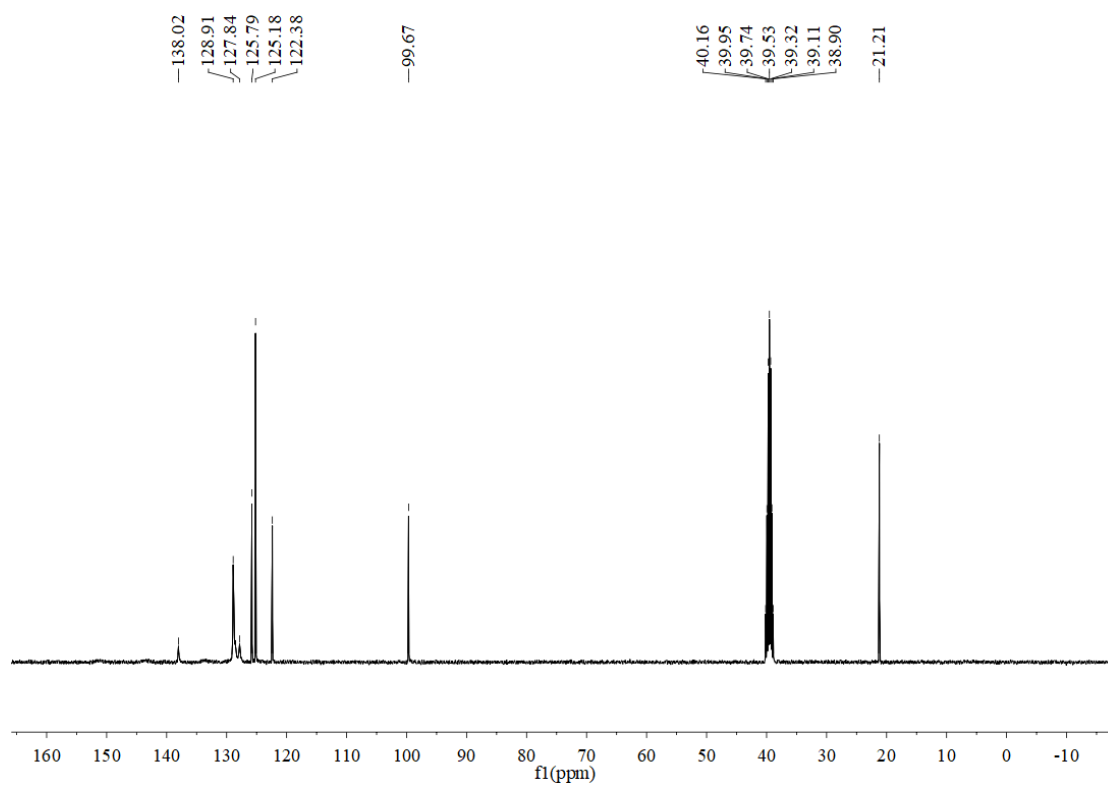



**Figure S43  $^1\text{H}$  NMR Spectra of Compound of 3f**

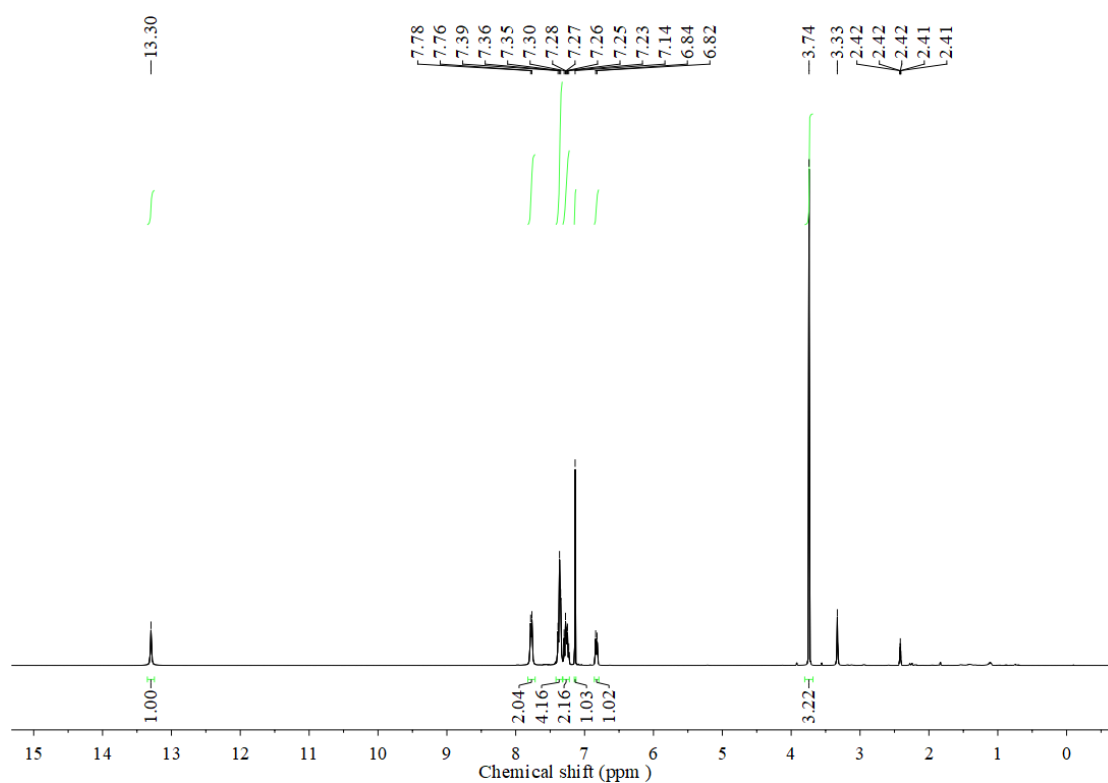

**Figure S44  $^{13}\text{C}$  NMR Spectra of Compound of 3f**

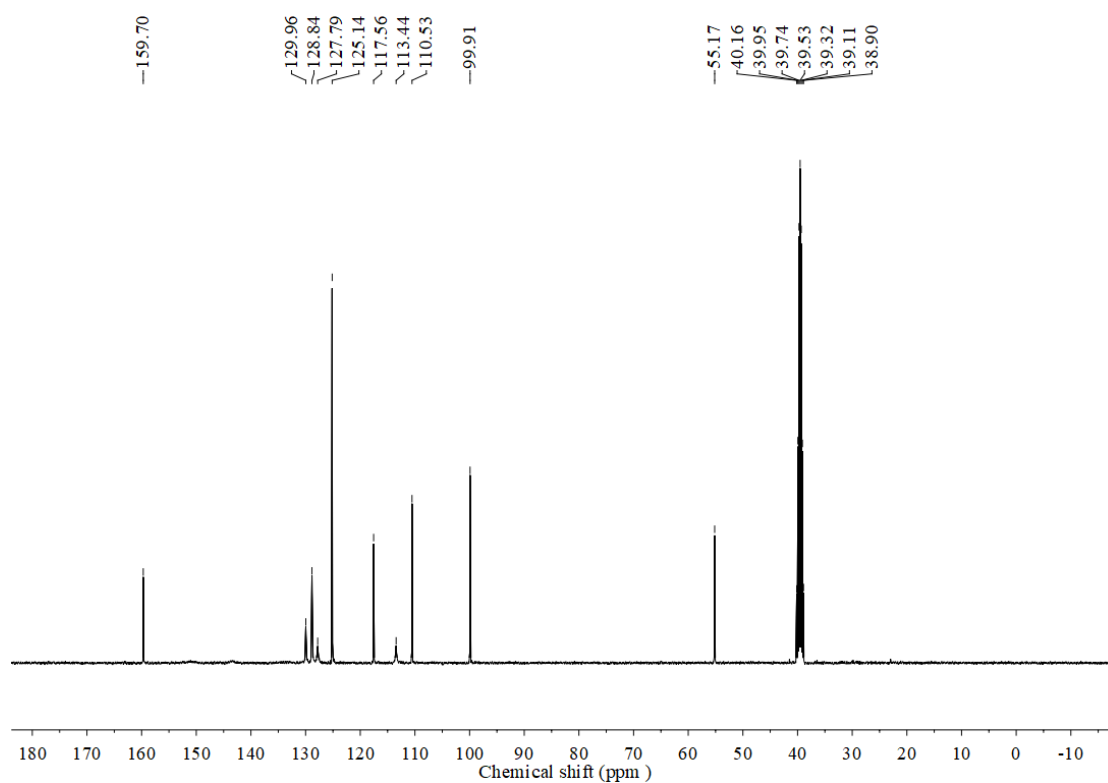

**Figure S45  $^1\text{H}$  NMR Spectra of Compound of 3g**

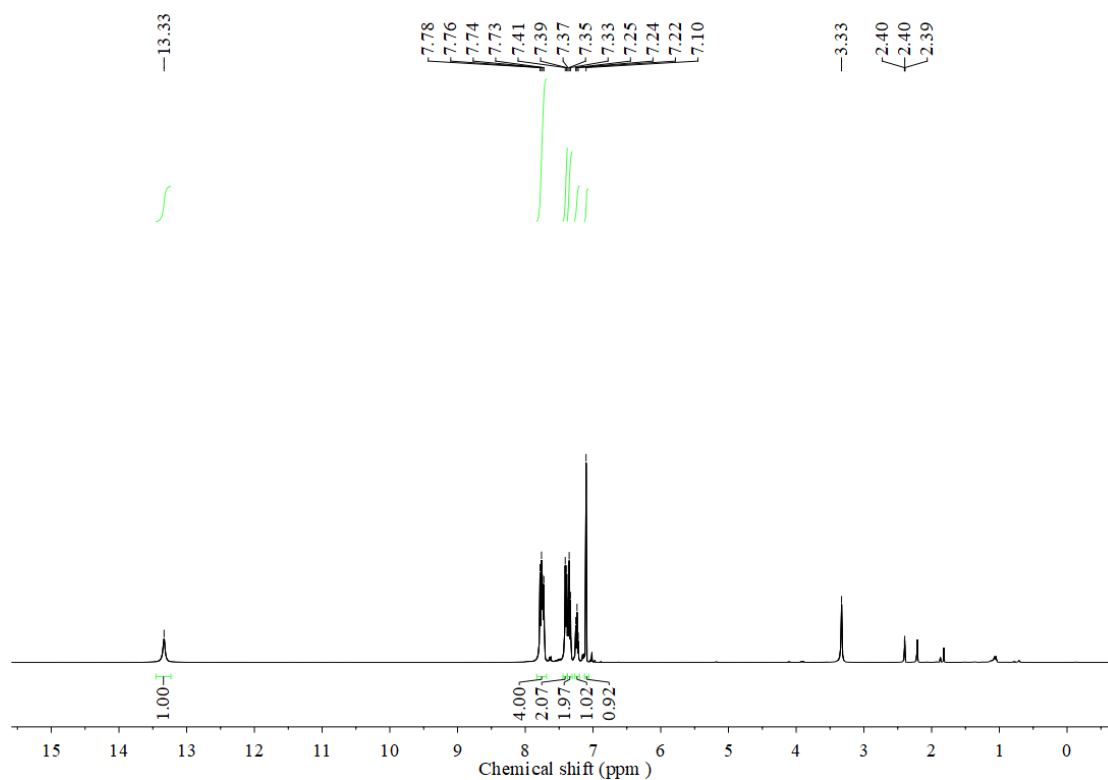

**Figure S46  $^{13}\text{C}$  NMR Spectra of Compound of 3g**

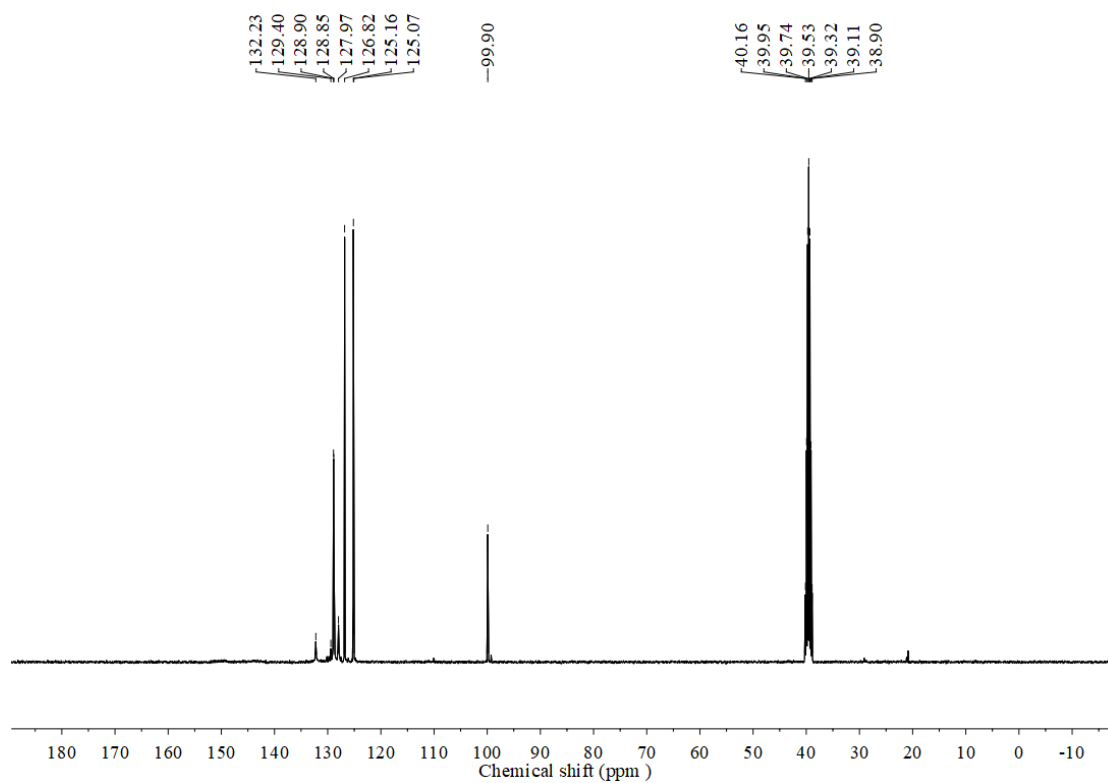

**Figure S47  $^1\text{H}$  NMR Spectra of Compound of 3h**

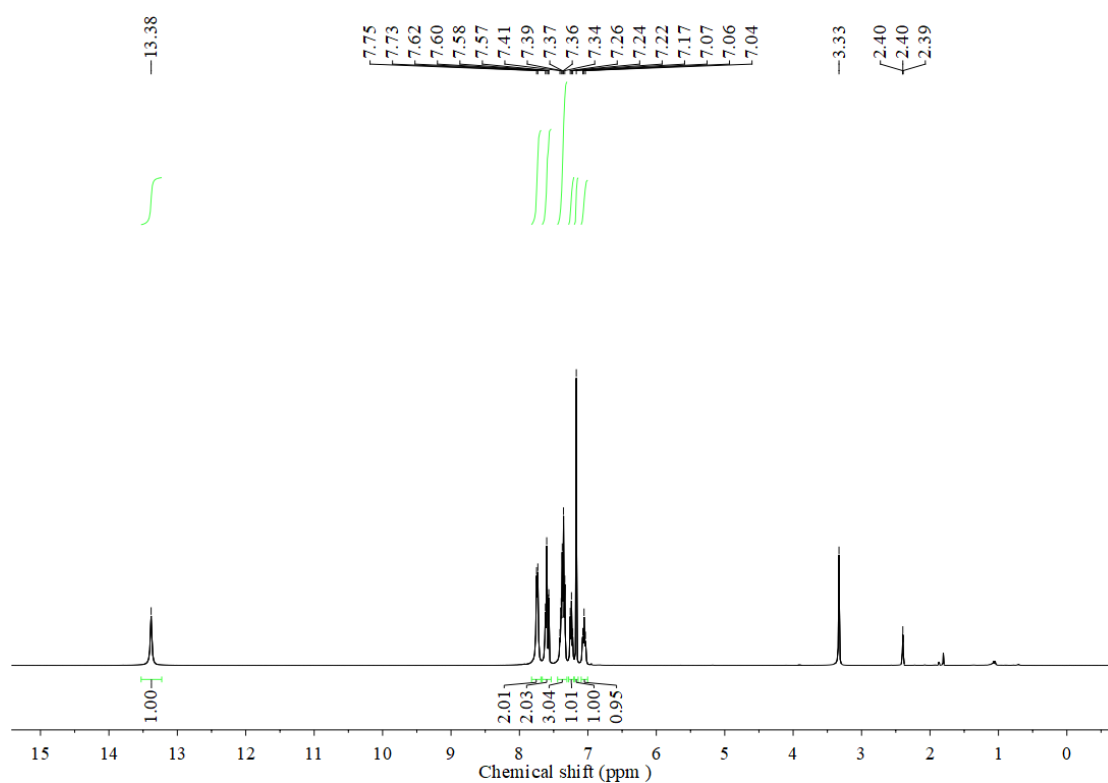

**Figure S48  $^{13}\text{C}$  NMR Spectra of Compound of 3h**

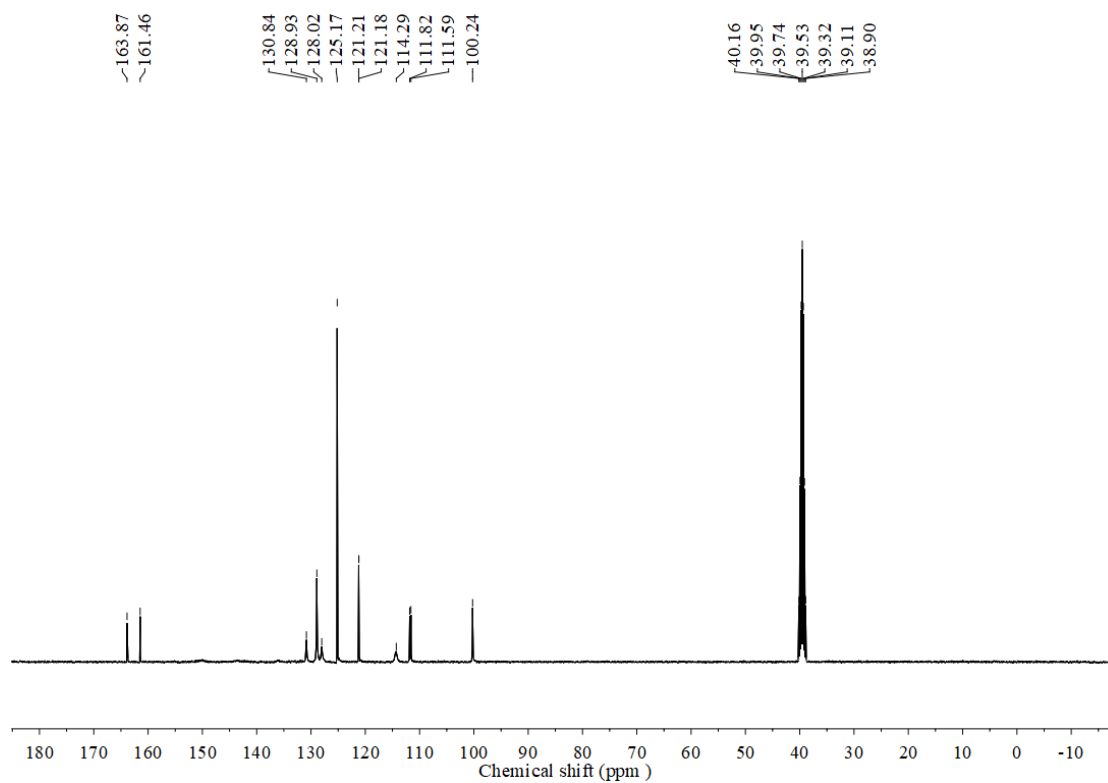

**Figure S49  $^1\text{H}$  NMR Spectra of Compound of 3i**

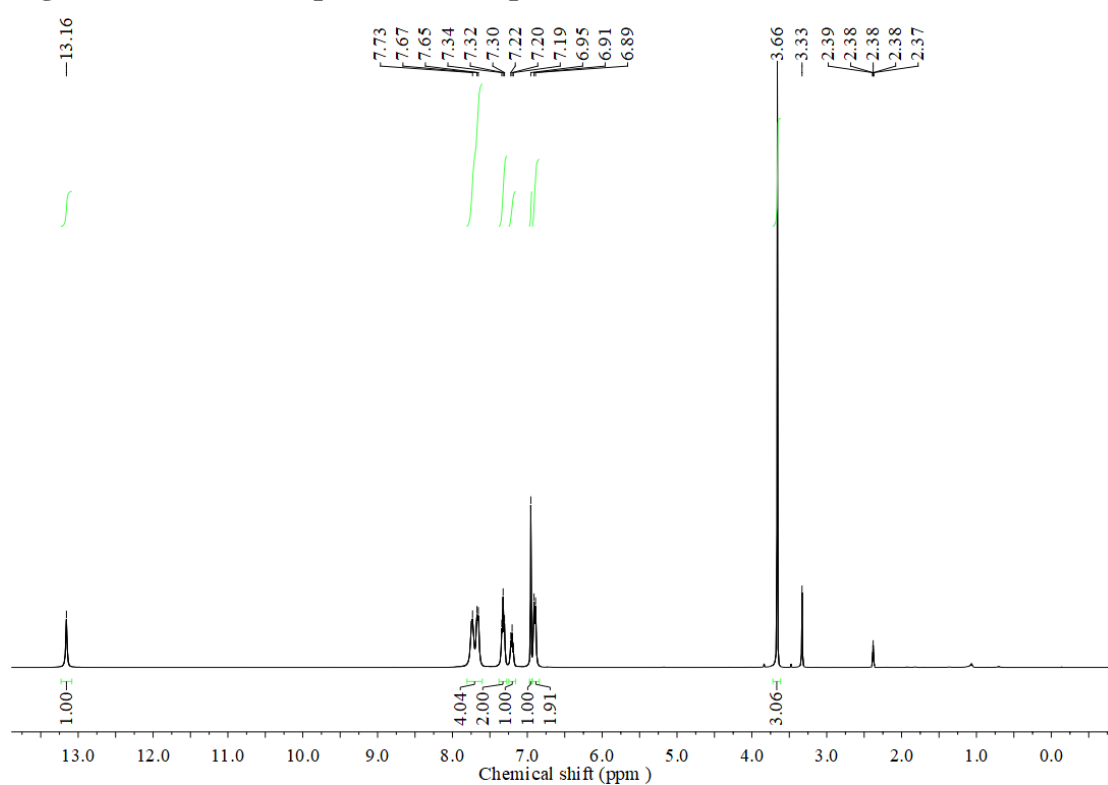

**Figure S50  $^{13}\text{C}$  NMR Spectra of Compound of 3i**

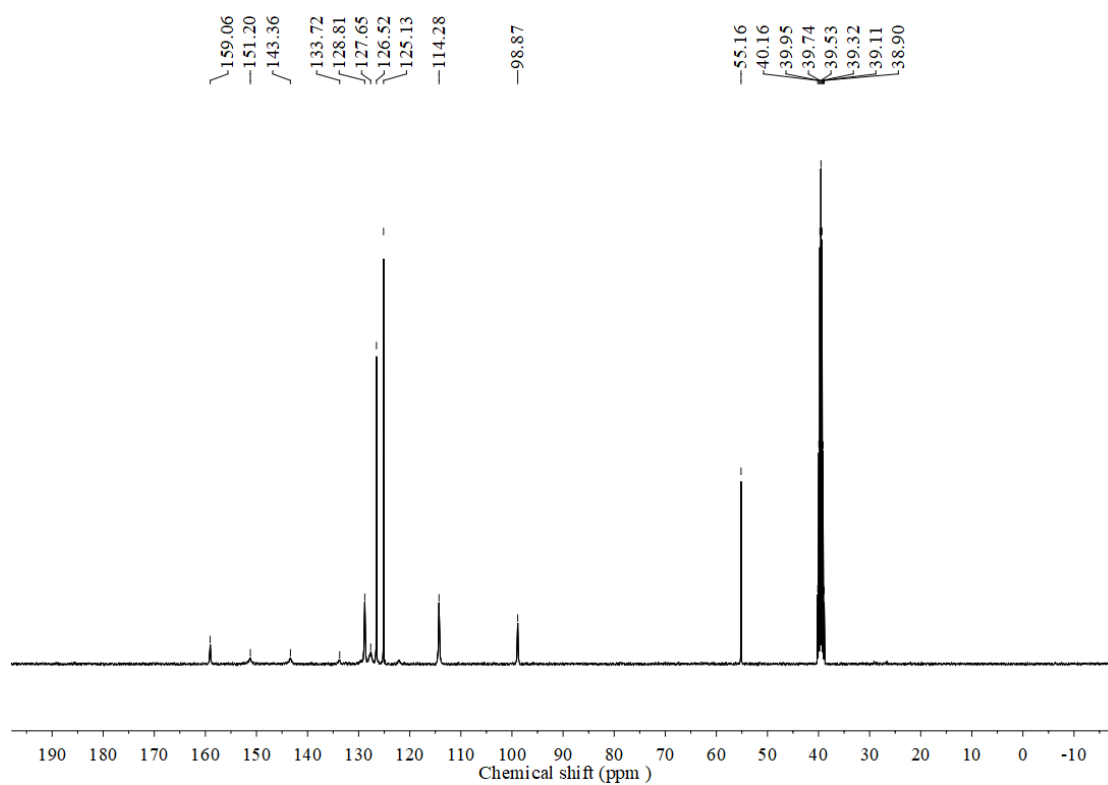

**Figure S51  $^1\text{H}$  NMR Spectra of Compound of 3j**

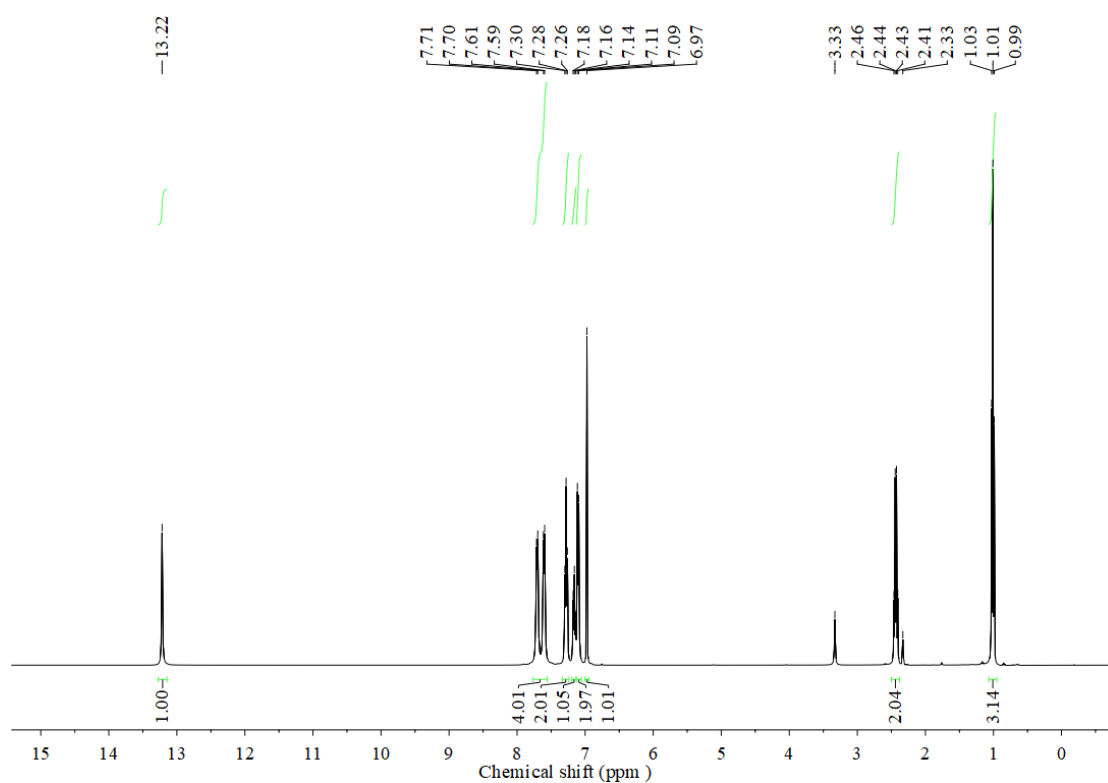

**Figure S52  $^{13}\text{C}$  NMR Spectra of Compound of 3j**

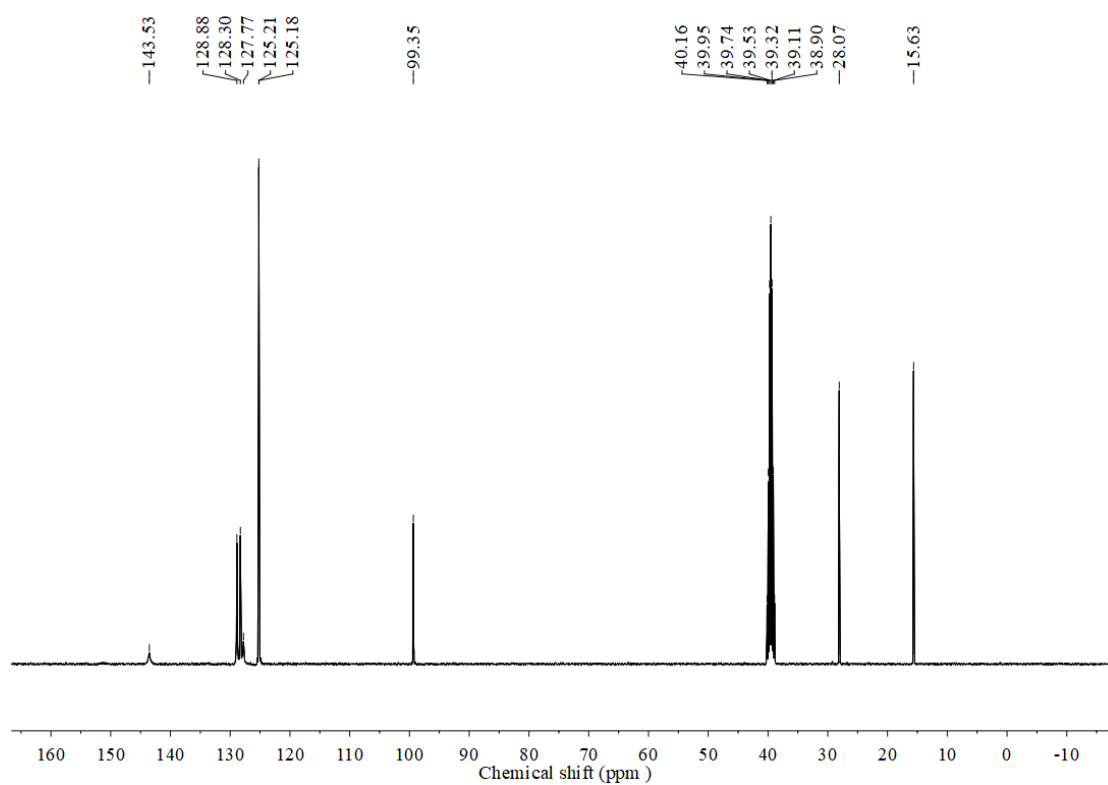

**Figure S53  $^1\text{H}$  NMR Spectra of Compound of 3k**

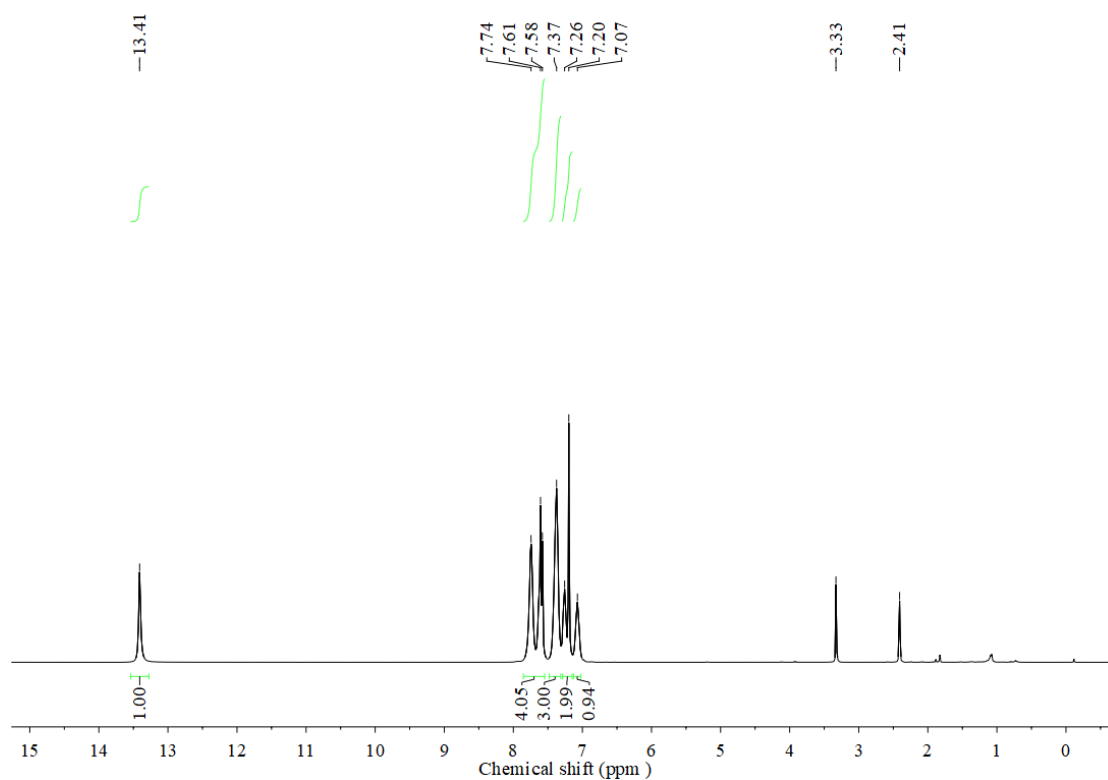

**Figure S54  $^{13}\text{C}$  NMR Spectra of Compound of 3k**

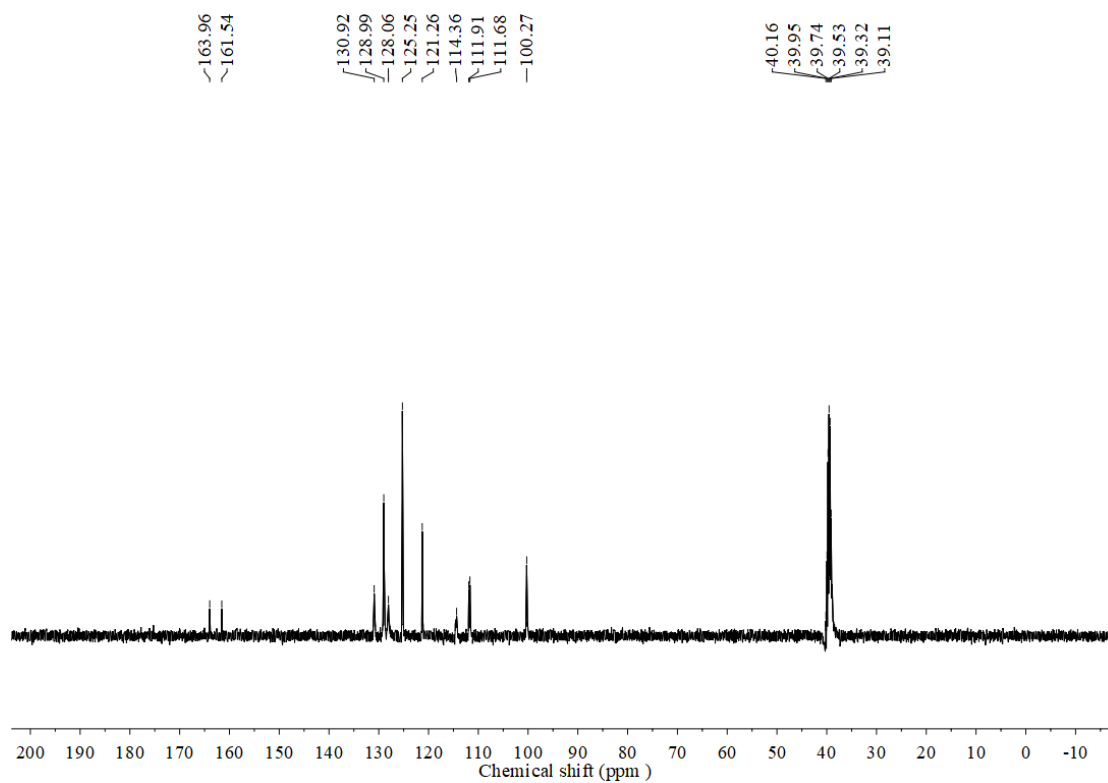

**Figure S55  $^1\text{H}$  NMR Spectra of Compound of 3l**

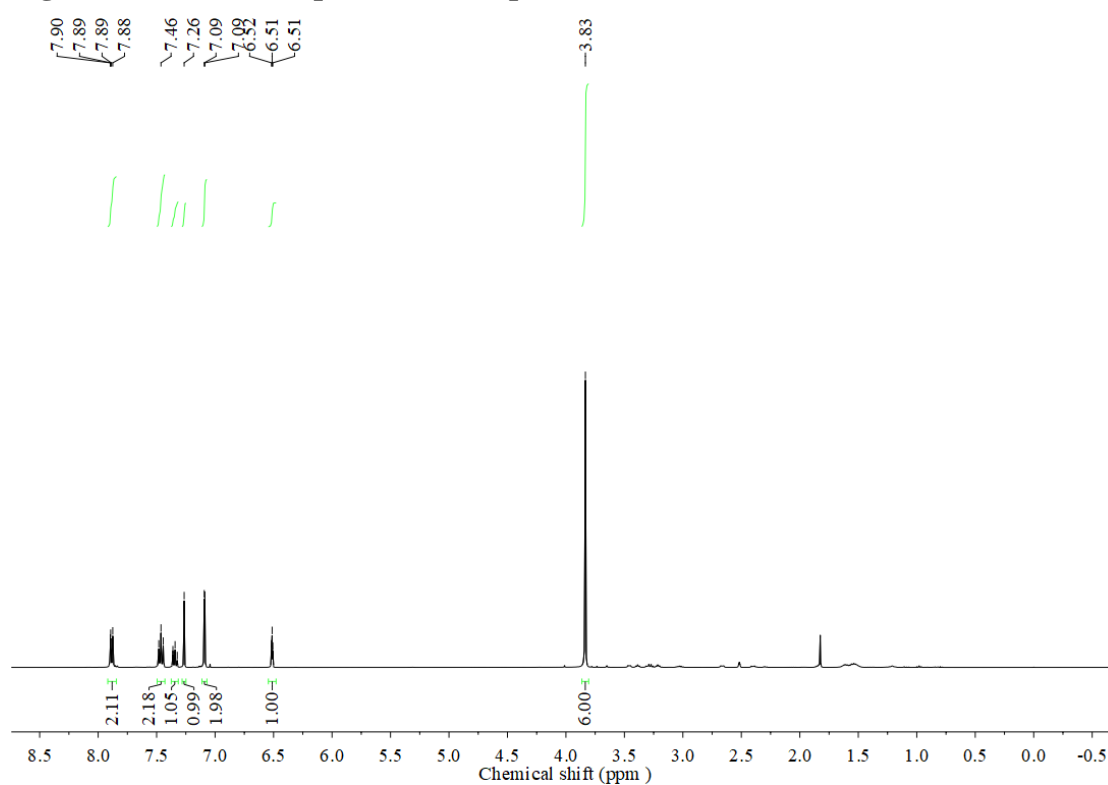

**Figure S56  $^{13}\text{C}$  NMR Spectra of Compound of 3l**

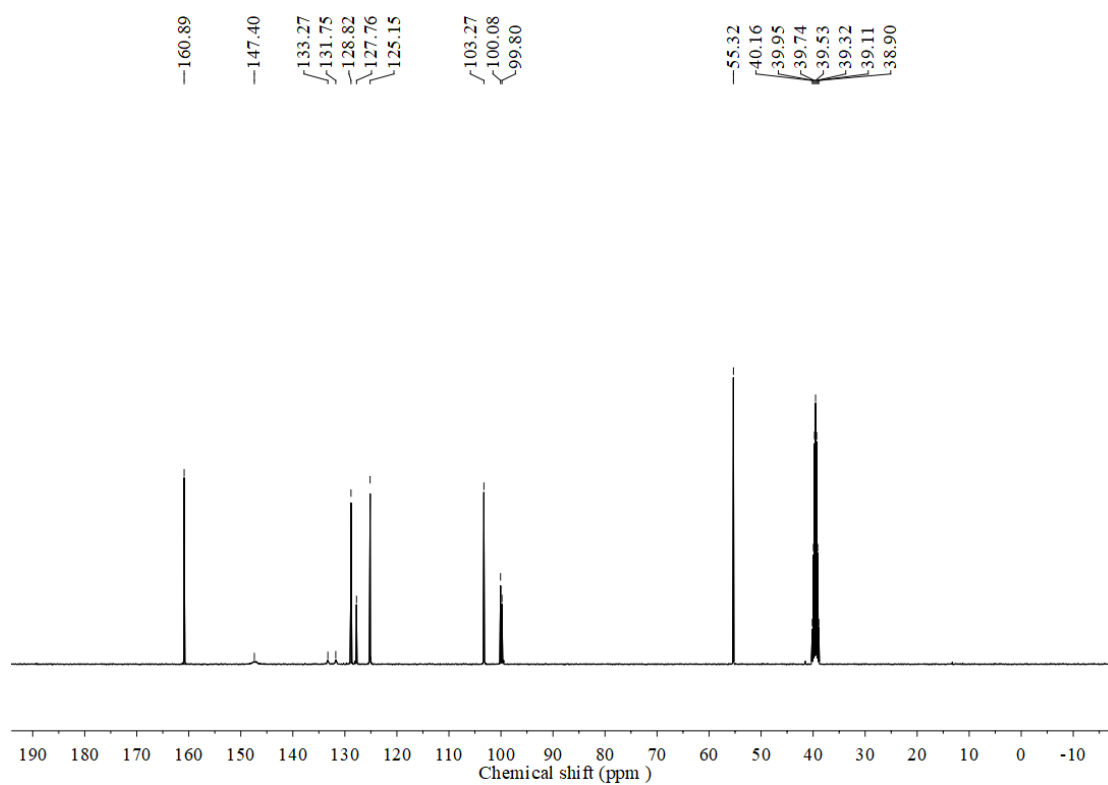

**Figure S57  $^1\text{H}$  NMR Spectra of Compound of 3m**

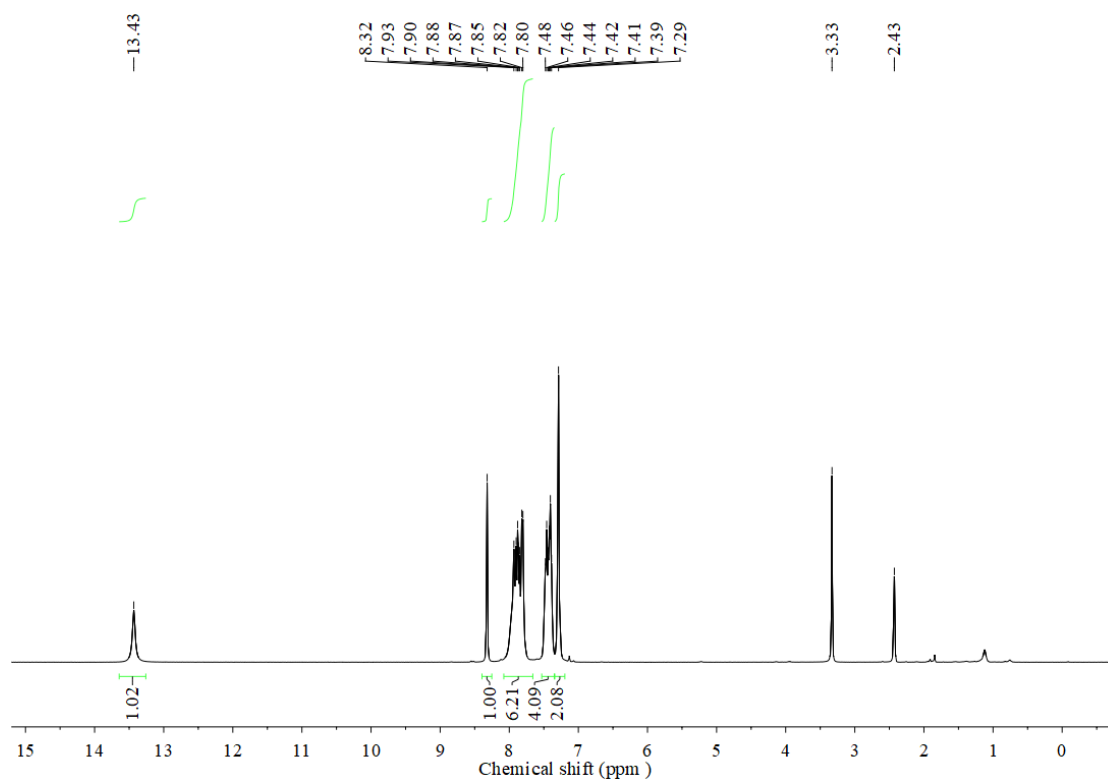

**Figure S58  $^{13}\text{C}$  NMR Spectra of Compound of 3m**

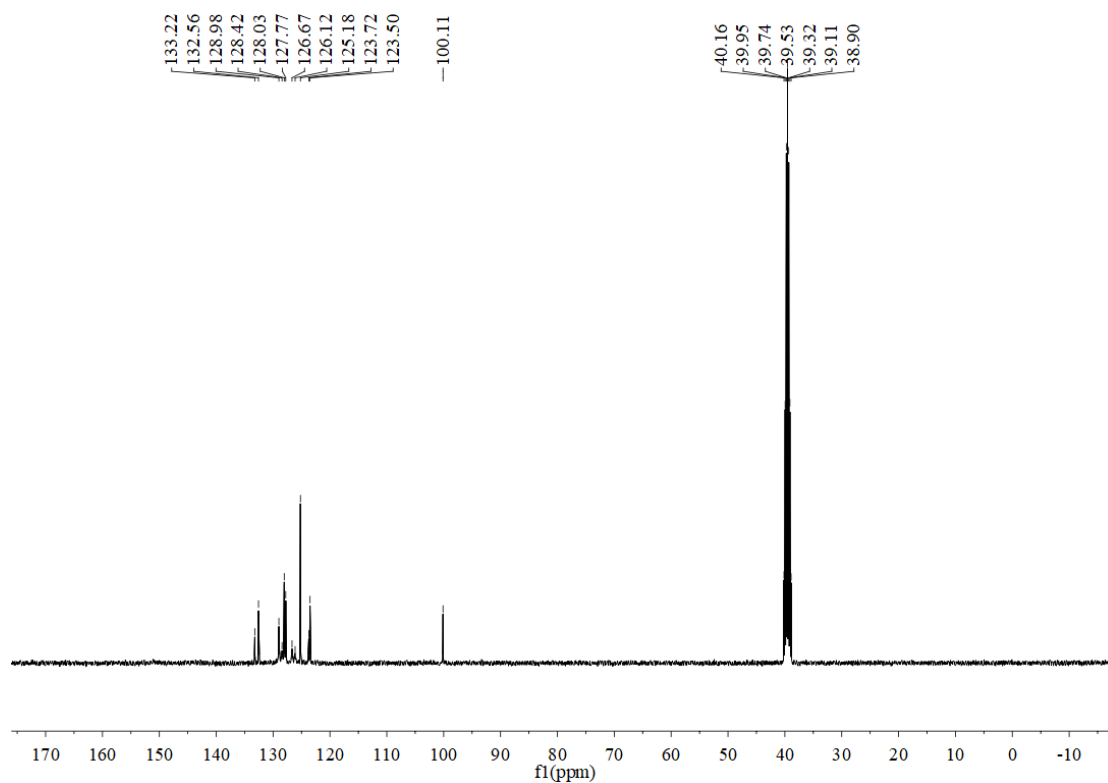



**Figure S59  $^1\text{H}$  NMR Spectra of Compound of 3n**

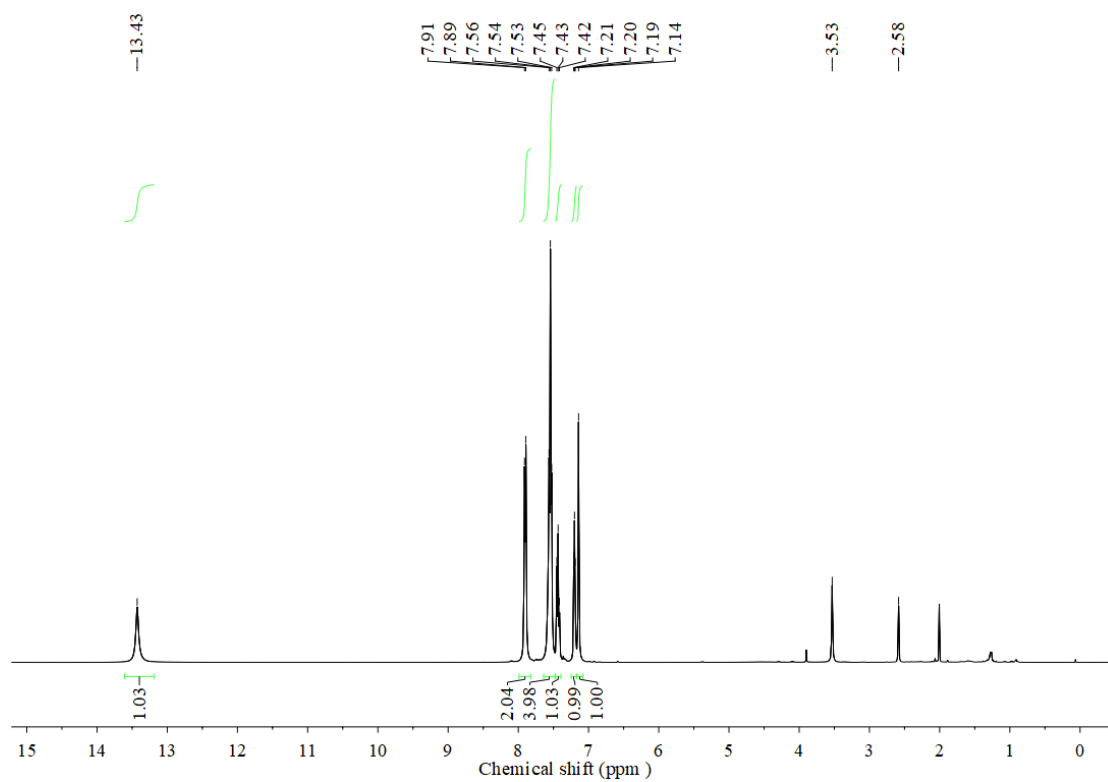

**Figure S60  $^{13}\text{C}$  NMR Spectra of Compound of 3n**

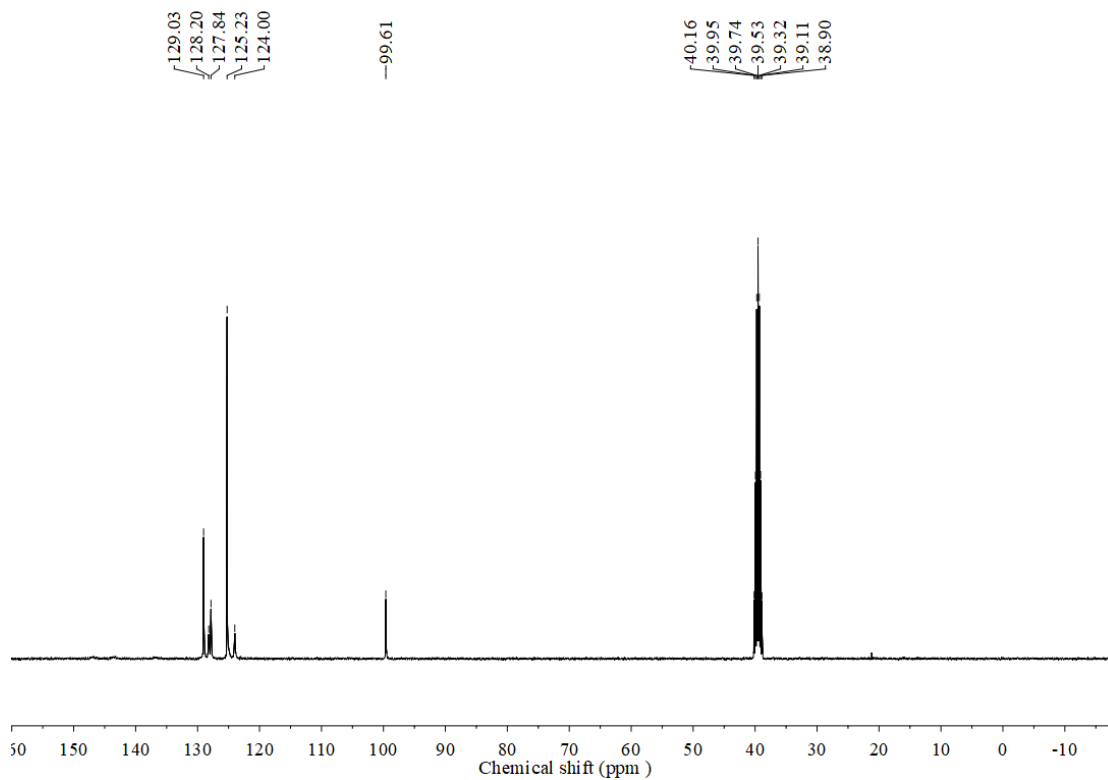

Supplement: s1 [file s1]
